# Supplementary material for: Test accuracy of drug and antibody assays for predicting response to antitumour necrosis factor treatment in Crohn’s disease: a systematic review and meta-analysis
Source: PubMed Central journal article supplement (PMC5734585; doi:10.1136/bmjopen-2016-014581), 2017-07-02
Supplement: bmjopen-2016-014581supp002.pdf [file bmjopen-2016-014581supp002.pdf]

## Supplement 1 Search strategy

Ovid MEDLINE(R) 1946 to October Week 2 2014, searched on 22/10/2014

|    |                                                                  |        |
|----|------------------------------------------------------------------|--------|
| 1  | adalimumab.mp.                                                   | 3597   |
| 2  | ADA.tw.                                                          | 7105   |
| 3  | infliximab.mp.                                                   | 8842   |
| 4  | IFX.tw.                                                          | 326    |
| 5  | ((anti-TNF* or antiTNF* or TNF*) adj2 inhibitor*).mp.            | 2577   |
| 6  | anti* tumo?r* necrosis* factor*.mp.                              | 3007   |
| 7  | Tumor Necrosis Factor-alpha/ and Antibodies, Monoclonal/         | 7682   |
| 8  | anti* drug* antibod*.tw.                                         | 186    |
| 9  | ADAb.tw.                                                         | 19     |
| 10 | 1 or 2 or 3 or 4 or 5 or 6 or 7 or 8 or 9                        | 24181  |
| 11 | lisa* tracker*.mp.                                               | 1      |
| 12 | (immundiagnostik* or immunodiagnostik* or immunediagnostik*).mp. | 159    |
| 13 | (proteomika* or promonitor*).mp.                                 | 13     |
| 14 | exp Enzyme-Linked Immunosorbent Assay/                           | 129174 |
| 15 | enzyme* link* immunoassay*.mp.                                   | 2873   |
| 16 | enzyme* link* immuno* assay*.mp.                                 | 158537 |
| 17 | ELISA*.mp.                                                       | 113426 |
| 18 | 11 or 12 or 13 or 14 or 15 or 16 or 17                           | 205224 |
| 19 | *Radioimmunoassay/                                               | 7091   |
| 20 | (radioimmuno* or radio immuno* or radio-immuno*).mp.             | 101819 |
| 21 | RIA.tw.                                                          | 17353  |
| 22 | reporter* gene* assay*.mp.                                       | 3663   |
| 23 | RGA.tw.                                                          | 336    |
| 24 | semi* fluid* phase* enzyme* immuno*.mp.                          | 0      |

|    |                                                                                                                                                                                                                        |         |
|----|------------------------------------------------------------------------------------------------------------------------------------------------------------------------------------------------------------------------|---------|
| 25 | EIA.tw.                                                                                                                                                                                                                | 8288    |
| 26 | ((homogenous* or homogeneous*) adj1 mobil* shift* assay*).mp.                                                                                                                                                          | 4       |
| 27 | HMSA.tw.                                                                                                                                                                                                               | 62      |
| 28 | (Biomonitor* or iLite).tw.                                                                                                                                                                                             | 4102    |
| 29 | (Matriks* Biotek* or Shikari*).mp.                                                                                                                                                                                     | 2       |
| 30 | (Prometheus* or Anser IFX or Anser ADA).mp.                                                                                                                                                                            | 258     |
| 31 | 19 or 20 or 21 or 22 or 23 or 24 or 25 or 26 or 27 or 28 or 29 or 30                                                                                                                                                   | 124775  |
| 32 | ((monitor* or pharmacokinetic* or measur* or level* or concentration*) adj3 (adalimumab or ADA or infliximab or IFX or Anti-TNF* or Anti-Tumour Necrosis Factor*)).mp.                                                 | 1087    |
| 33 | Inflammatory Bowel Diseases/                                                                                                                                                                                           | 14444   |
| 34 | Crohn Disease/                                                                                                                                                                                                         | 31596   |
| 35 | crohn*.tw.                                                                                                                                                                                                             | 32370   |
| 36 | inflammator* bowel* disease*.tw.                                                                                                                                                                                       | 26840   |
| 37 | IBD.tw.                                                                                                                                                                                                                | 11936   |
| 38 | 33 or 34 or 35 or 36 or 37                                                                                                                                                                                             | 58401   |
| 39 | ((monitor* or pharmacokinetic* or measur* or level* or concentration*) adj3 (adalimumab or infliximab or Anti-TNF* or AntiTNF* or Anti-Tumour Necrosis Factor*)) and (correlat* or associat* or test performance)).mp. | 218     |
| 40 | 10 and 18 and 38                                                                                                                                                                                                       | 93      |
| 41 | 10 and 31 and 38                                                                                                                                                                                                       | 19      |
| 42 | 32 and 38                                                                                                                                                                                                              | 157     |
| 43 | 39 or 40 or 41 or 42                                                                                                                                                                                                   | 367     |
| 44 | Animals/ not Humans/                                                                                                                                                                                                   | 3983380 |
| 45 | 43 not 44                                                                                                                                                                                                              | 349     |

**Ovid MEDLINE(R) In-Process & Other Non-Indexed Citations October 21, 2014, searched on 22/10/2014**

|    |                                                                  |       |
|----|------------------------------------------------------------------|-------|
| 1  | adalimumab.mp.                                                   | 469   |
| 2  | ADA.tw.                                                          | 426   |
| 3  | infliximab.mp.                                                   | 814   |
| 4  | IFX.tw.                                                          | 69    |
| 5  | ((anti-TNF* or antiTNF* or TNF*) adj2 inhibitor*).mp.            | 308   |
| 6  | anti* tumo?r* necrosis* factor*.mp.                              | 323   |
| 7  | anti* drug* antibod*.tw.                                         | 39    |
| 8  | ADAb.tw.                                                         | 1     |
| 9  | 1 or 2 or 3 or 4 or 5 or 6 or 7 or 8                             | 1824  |
| 10 | lisa* tracker*.mp.                                               | 0     |
| 11 | (immundiagnostik* or immunodiagnostik* or immunediagnostik*).mp. | 2     |
| 12 | (proteomika* or promonitor*).mp.                                 | 0     |
| 13 | enzyme* link* immunoassay*.mp.                                   | 133   |
| 14 | enzyme* link* immuno* assay*.mp.                                 | 3996  |
| 15 | ELISA*.mp.                                                       | 8044  |
| 16 | 10 or 11 or 12 or 13 or 14 or 15                                 | 10101 |
| 17 | (radioimmuno* or radio immuno* or radio-immuno*).mp.             | 1176  |
| 18 | RIA.tw.                                                          | 386   |
| 19 | reporter* gene* assay*.mp.                                       | 240   |
| 20 | RGA.tw.                                                          | 47    |
| 21 | semi* fluid* phase* enzyme* immuno*.mp.                          | 0     |
| 22 | EIA.tw.                                                          | 357   |
| 23 | ((homogenous* or homogeneous*) adj1 mobil* shift* assay*).mp.    | 0     |
| 24 | HMSA.tw.                                                         | 5     |
| 25 | (Biomonitor* or iLite).tw.                                       | 343   |

|    |                                                                                                                                                                                                                        |      |
|----|------------------------------------------------------------------------------------------------------------------------------------------------------------------------------------------------------------------------|------|
| 26 | (Matriks* Biotek* or Shikari*).mp.                                                                                                                                                                                     | 1    |
| 27 | (Prometheus* or Anser IFX or Anser ADA).mp.                                                                                                                                                                            | 23   |
| 28 | 17 or 18 or 19 or 20 or 21 or 22 or 23 or 24 or 25 or 26 or 27                                                                                                                                                         | 2386 |
| 29 | ((monitor* or pharmacokinetic* or measur* or level* or concentration*) adj3 (adalimumab or ADA or infliximab or IFX or Anti-TNF* or Anti-Tumour Necrosis Factor*)).mp.                                                 | 112  |
| 30 | crohn*.tw.                                                                                                                                                                                                             | 2478 |
| 31 | inflammator* bowel* disease*.tw.                                                                                                                                                                                       | 2627 |
| 32 | IBD.tw.                                                                                                                                                                                                                | 1480 |
| 33 | 30 or 31 or 32                                                                                                                                                                                                         | 4400 |
| 34 | ((monitor* or pharmacokinetic* or measur* or level* or concentration*) adj3 (adalimumab or infliximab or Anti-TNF* or AntiTNF* or Anti-Tumour Necrosis Factor*)) and (correlat* or associat* or test performance)).mp. | 30   |
| 35 | 9 and 16 and 33                                                                                                                                                                                                        | 15   |
| 36 | 9 and 28 and 33                                                                                                                                                                                                        | 0    |
| 37 | 29 and 33                                                                                                                                                                                                              | 35   |
| 38 | 34 or 35 or 36 or 37                                                                                                                                                                                                   | 57   |

**Embase Classic+Embase 1947 to 2014 Week 42, searched on 22/10/2014**

|   |                                                       |       |
|---|-------------------------------------------------------|-------|
| 1 | adalimumab.tw.                                        | 7379  |
| 2 | *adalimumab/                                          | 3997  |
| 3 | ADA.tw.                                               | 10848 |
| 4 | infliximab.tw.                                        | 13600 |
| 5 | *infliximab/                                          | 8056  |
| 6 | IFX.tw.                                               | 1722  |
| 7 | ((anti-TNF* or antiTNF* or TNF*) adj2 inhibitor*).tw. | 4663  |
| 8 | anti* tumo?r* necrosis* factor*.tw.                   | 4171  |

|    |                                                                      |        |
|----|----------------------------------------------------------------------|--------|
| 9  | *tumor necrosis factor alpha inhibitor/                              | 1283   |
| 10 | anti* drug* antibod*.tw.                                             | 469    |
| 11 | ADAb.tw.                                                             | 44     |
| 12 | *drug antibody/                                                      | 1528   |
| 13 | 1 or 2 or 3 or 4 or 5 or 6 or 7 or 8 or 9 or 10 or 11 or 12          | 35630  |
| 14 | lisa* tracker*.tw.                                                   | 11     |
| 15 | (immundiagnostik* or immunodiagnostik* or immunediagnostik*).tw.     | 74     |
| 16 | (proteomika* or promonitor*).tw.                                     | 27     |
| 17 | *enzyme linked immunosorbent assay/                                  | 14622  |
| 18 | enzyme* link* immunoassay*.tw.                                       | 3275   |
| 19 | enzyme* link* immuno* assay*.tw.                                     | 71923  |
| 20 | ELISA*.tw.                                                           | 166866 |
| 21 | 14 or 15 or 16 or 17 or 18 or 19 or 20                               | 207373 |
| 22 | *radioimmunoassay/                                                   | 17240  |
| 23 | (radioimmuno* or radio immuno* or radio-immuno*).tw.                 | 74895  |
| 24 | RIA.tw.                                                              | 20769  |
| 25 | reporter* gene* assay*.tw.                                           | 4396   |
| 26 | RGA.tw.                                                              | 400    |
| 27 | semi* fluid* phase* enzyme* immuno*.tw.                              | 1      |
| 28 | EIA.tw.                                                              | 10836  |
| 29 | ((homogenous* or homogeneous*) adj1 mobil* shift* assay*).tw.        | 39     |
| 30 | HMSA.tw.                                                             | 98     |
| 31 | (Biomonitor* or iLite).tw.                                           | 5664   |
| 32 | (Matriks* Biotek* or Shikari*).tw.                                   | 13     |
| 33 | (Prometheus* or Anser IFX or Anser ADA).tw.                          | 568    |
| 34 | 22 or 23 or 24 or 25 or 26 or 27 or 28 or 29 or 30 or 31 or 32 or 33 | 113752 |

|    |                                                                                                                                                                                                                          |         |
|----|--------------------------------------------------------------------------------------------------------------------------------------------------------------------------------------------------------------------------|---------|
| 35 | ((monitor* or pharmacokinetic* or measur* or level* or concentration*) adj3 (adalimumab or ADA or infliximab or IFX or Anti-TNF* or Anti-Tumour Necrosis Factor*)).tw.                                                   | 2016    |
| 36 | *crohn disease/                                                                                                                                                                                                          | 34280   |
| 37 | crohn*.tw.                                                                                                                                                                                                               | 50039   |
| 38 | inflammator* bowel* disease*.tw.                                                                                                                                                                                         | 41418   |
| 39 | IBD.tw.                                                                                                                                                                                                                  | 23266   |
| 40 | 36 or 37 or 38 or 39                                                                                                                                                                                                     | 82551   |
| 41 | ((((monitor* or pharmacokinetic* or measur* or level* or concentration*) adj3 (adalimumab or infliximab or Anti-TNF* or AntiTNF* or Anti-Tumour Necrosis Factor*)) and (correlat* or associat* or test performance)).tw. | 544     |
| 42 | 13 and 21 and 40                                                                                                                                                                                                         | 278     |
| 43 | 13 and 34 and 40                                                                                                                                                                                                         | 109     |
| 44 | 35 and 40                                                                                                                                                                                                                | 507     |
| 45 | 41 or 42 or 43 or 44                                                                                                                                                                                                     | 938     |
| 46 | nonhuman/ not human/                                                                                                                                                                                                     | 3490973 |
| 47 | 45 not 46                                                                                                                                                                                                                | 917     |

**Cochrane Library (Wiley), searched on 22/10/2014**

|    |                                                               |      |
|----|---------------------------------------------------------------|------|
| #1 | adalimumab:ti,ab,kw                                           | 451  |
| #2 | ADA:ti,ab                                                     | 237  |
| #3 | infliximab:ti,ab,kw                                           | 767  |
| #4 | IFX:ti,ab                                                     | 39   |
| #5 | ((anti-TNF* or antiTNF* or TNF*) near/2 inhibitor*):ti,ab,kw  | 106  |
| #6 | (anti* next tumo*r* next necrosis* next factor*):ti,ab,kw     | 256  |
| #7 | MeSH descriptor: [Tumor Necrosis Factor-alpha] this term only | 2408 |
| #8 | MeSH descriptor: [Antibodies, Monoclonal] this term only      | 3978 |
| #9 | #7 and #8                                                     | 409  |

|     |                                                                                                                                                                                         |      |
|-----|-----------------------------------------------------------------------------------------------------------------------------------------------------------------------------------------|------|
| #10 | (anti* next drug* next antibod*):ti,ab,kw                                                                                                                                               | 19   |
| #11 | (ADAb):ti,ab,kw                                                                                                                                                                         | 0    |
| #12 | #1 or #2 or #3 or #4 or #5 or #6 or #7 or #8 or #9 or #10 or #11                                                                                                                        | 6714 |
| #13 | (lisa* next tracker*):ti,ab,kw                                                                                                                                                          | 0    |
| #14 | (immundiagnostik* or immunodiagnostik* or immunediagnostik*):ti,ab,kw                                                                                                                   | 0    |
| #15 | (proteomika* or promonitor*):ti,ab,kw                                                                                                                                                   | 0    |
| #16 | MeSH descriptor: [Enzyme-Linked Immunosorbent Assay] explode all trees                                                                                                                  | 2122 |
| #17 | (enzyme* next link* next immunoassay*):ti,ab,kw                                                                                                                                         | 84   |
| #18 | ELISA*:ti,ab,kw                                                                                                                                                                         | 2534 |
| #19 | #13 or #14 or #15 or #16 or #17 or #18                                                                                                                                                  | 3958 |
| #20 | MeSH descriptor: [Radioimmunoassay] explode all trees                                                                                                                                   | 1176 |
| #21 | (radioimmuno* or radio next immuno* or radio-immuno*):ti,ab,kw                                                                                                                          | 2761 |
| #22 | RIA:ti,ab                                                                                                                                                                               | 570  |
| #23 | (reporter* next gene* next assay*):ti,ab,kw                                                                                                                                             | 11   |
| #24 | RGA:ti,ab                                                                                                                                                                               | 8    |
| #25 | (semi* next fluid* next phase* next enzyme* next immuno*):ti,ab,kw                                                                                                                      | 0    |
| #26 | EIA:ti,ab                                                                                                                                                                               | 339  |
| #27 | ((homogenous* or homogeneous*) near/1 (mobilit* next shift* next assay*)):ti,ab,kw                                                                                                      | 1    |
| #28 | HMSA:ti,ab                                                                                                                                                                              | 1    |
| #29 | (Biomonitor* or iLite):ti,ab,kw                                                                                                                                                         | 14   |
| #30 | (Matriks* next Biotek* or Shikari*):ti,ab,kw                                                                                                                                            | 0    |
| #31 | (Prometheus* or Anser next IFX or Anser next ADA):ti,ab,kw                                                                                                                              | 23   |
| #32 | #20 or #21 or #22 or #23 or #24 or #25 or #26 or #27 or #28 or #29 or #30 or #31                                                                                                        | 3651 |
| #33 | ((monitor* or pharmacokinetic* or measur* or level* or concentration*) near/3 (adalimumab or ADA or infliximab or IFX or Anti-TNF* or Anti-Tumour next Necrosis next Factor*)):ti,ab,kw | 83   |

|     |                                                                                                                                                                                                                                              |      |
|-----|----------------------------------------------------------------------------------------------------------------------------------------------------------------------------------------------------------------------------------------------|------|
| #34 | MeSH descriptor: [Inflammatory Bowel Diseases] this term only                                                                                                                                                                                | 273  |
| #35 | MeSH descriptor: [Crohn Disease] this term only                                                                                                                                                                                              | 997  |
| #36 | crohn*:ti,ab,kw                                                                                                                                                                                                                              | 1512 |
| #37 | (inflammator* next bowel* next disease*):ti,ab,kw                                                                                                                                                                                            | 798  |
| #38 | IBD:ti,ab                                                                                                                                                                                                                                    | 271  |
| #39 | #34 or #35 or #36 or #37 or #38                                                                                                                                                                                                              | 2037 |
| #40 | ((monitor* or pharmacokinetic* or measur* or level* or concentration*) near/3 (adalimumab or infliximab or Anti-TNF* or AntiTNF* or Anti-Tumour next Necrosis next Factor*)) and (correlat* or associat* or test next performance)):ti,ab,kw | 33   |
| #41 | #12 and #19 and #39                                                                                                                                                                                                                          | 8    |
| #42 | #12 and #32 and #39                                                                                                                                                                                                                          | 1    |
| #43 | #33 and #39                                                                                                                                                                                                                                  | 18   |
| #44 | #40 or #41 or #42 or #43                                                                                                                                                                                                                     | 49   |

All Results (49)

Cochrane Reviews (0)

All Review Protocol

Other Reviews (1)

Trials (47)

Methods Studies (0)

Technology Assessments (1)

Economic Evaluations (0)

Cochrane Groups (0)

**Science Citation Index and Conference Proceedings – Science (Web of Science), searched on 22/10/2014**

|      |     |                                                                             |
|------|-----|-----------------------------------------------------------------------------|
| # 40 | 806 | #39 OR #38 OR #37 OR #36<br>Indexes=SCI-EXPANDED, CPCI-S Timespan=All years |
| # 39 | 324 | #35 AND #32<br>Indexes=SCI-EXPANDED, CPCI-S Timespan=All years              |
| # 38 | 26  | #35 AND #31 AND #9                                                          |



|      |        |                                                                                                                                                                                                                                                                                            |
|------|--------|--------------------------------------------------------------------------------------------------------------------------------------------------------------------------------------------------------------------------------------------------------------------------------------------|
|      |        | Indexes=SCI-EXPANDED, CPCI-S Timespan=All years                                                                                                                                                                                                                                            |
| # 37 | 128    | #35 AND #16 AND #9<br>Indexes=SCI-EXPANDED, CPCI-S Timespan=All years                                                                                                                                                                                                                      |
| # 36 | 539    | TS=(((monitor* or pharmacokinetic* or measur* or level* or concentration*) near/3 (adalimumab or ADA or infliximab or IFX or Anti-TNF* or ("Anti-Tumour Necrosis" near/1 Factor*))) and (correlat* or associat* or "test performance"))<br>Indexes=SCI-EXPANDED, CPCI-S Timespan=All years |
| # 35 | 80,743 | #34 OR #33<br>Indexes=SCI-EXPANDED, CPCI-S Timespan=All years                                                                                                                                                                                                                              |
| # 34 | 53,142 | TS=(((inflammator* near/1 bowel*) near/1 disease*) or IBD)<br>Indexes=SCI-EXPANDED, CPCI-S Timespan=All years                                                                                                                                                                              |
| # 33 | 50,398 | TS=crohn*<br>Indexes=SCI-EXPANDED, CPCI-S Timespan=All years                                                                                                                                                                                                                               |
| # 32 | 1,366  | TS=((monitor* or pharmacokinetic* or measur* or level* or concentration*) near/3 (adalimumab or ADA or infliximab or IFX or Anti-TNF* or ("Anti-Tumour Necrosis" near/1 Factor*)))<br>Indexes=SCI-EXPANDED, CPCI-S Timespan=All years                                                      |
| # 31 | 79,288 | #30 OR #29 OR #28 OR #27 OR #26 OR #25 OR #24 OR #23 OR #22 OR #21 OR #20 OR #19 OR #18 OR #17<br>Indexes=SCI-EXPANDED, CPCI-S Timespan=All years                                                                                                                                          |
| # 30 | 713    | TS=(Prometheus* or "Anser IFX" or "Anser ADA")<br>Indexes=SCI-EXPANDED, CPCI-S Timespan=All years                                                                                                                                                                                          |
| # 29 | 10     | TS=((Matriks* near/1 Biotek*) or Shikari*)<br>Indexes=SCI-EXPANDED, CPCI-S Timespan=All years                                                                                                                                                                                              |
| # 28 | 8,841  | TS=(Biomonitor* or iLite)<br>Indexes=SCI-EXPANDED, CPCI-S Timespan=All years                                                                                                                                                                                                               |
| # 27 | 107    | TS=HMSA<br>Indexes=SCI-EXPANDED, CPCI-S Timespan=All years                                                                                                                                                                                                                                 |
| # 26 | 11     | TS=((homogenous* or homogeneous*) near/1 (mobilit* near/1 (shift* near/1 assay*)))<br>Indexes=SCI-EXPANDED, CPCI-S Timespan=All years                                                                                                                                                      |
| # 25 | 8,832  | TS=EIA<br>Indexes=SCI-EXPANDED, CPCI-S Timespan=All years                                                                                                                                                                                                                                  |
| # 24 | 1      | TS=((semi* near/1 fluid*) near/3 (enzyme* near/1 immuno*))<br>Indexes=SCI-EXPANDED, CPCI-S Timespan=All years                                                                                                                                                                              |

|      |         |                                                                                                                               |
|------|---------|-------------------------------------------------------------------------------------------------------------------------------|
| # 23 | 0       | TS=((semi* near/1 fluid*) near/2 (enzyme* near/1 immuno*))<br>Indexes=SCI-EXPANDED, CPCI-S Timespan=All years                 |
| # 22 | 0       | TS=(semi* near/1 fluid* near/1 phase* near/1 enzyme* near/1 immuno*)<br>Indexes=SCI-EXPANDED, CPCI-S Timespan=All years       |
| # 21 | 0       | TS=(((semi* near/1 fluid*) near/1 phase*) near/1 (enzyme* near/1 immuno*))<br>Indexes=SCI-EXPANDED, CPCI-S Timespan=All years |
| # 20 | 1,230   | TS=RGA<br>Indexes=SCI-EXPANDED, CPCI-S Timespan=All years                                                                     |
| # 19 | 4,518   | TS=(reporter* near/1 gene* near/1 assay*)<br>Indexes=SCI-EXPANDED, CPCI-S Timespan=All years                                  |
| # 18 | 12,773  | TS=RIA<br>Indexes=SCI-EXPANDED, CPCI-S Timespan=All years                                                                     |
| # 17 | 46,937  | TS=(radioimmuno* or (radio near/1 immuno*) or radio-immuno*)<br>Indexes=SCI-EXPANDED, CPCI-S Timespan=All years               |
| # 16 | 146,389 | #15 OR #14 OR #13 OR #12 OR #11 OR #10<br>Indexes=SCI-EXPANDED, CPCI-S Timespan=All years                                     |
| # 15 | 113,120 | TS=ELISA*<br>Indexes=SCI-EXPANDED, CPCI-S Timespan=All years                                                                  |
| # 14 | 60,666  | TS=((enzyme* near/1 link*) near/1 (immuno* near/1 assay))<br>Indexes=SCI-EXPANDED, CPCI-S Timespan=All years                  |
| # 13 | 2,850   | TS=((enzyme* near/1 link*) near/1 immunoassay*)<br>Indexes=SCI-EXPANDED, CPCI-S Timespan=All years                            |
| # 12 | 1       | TS=(proteomika* or promonitor*)<br>Indexes=SCI-EXPANDED, CPCI-S Timespan=All years                                            |
| # 11 | 9       | TS=(immundiagnostik* or immunodiagnostik* or immunediagnostik*)<br>Indexes=SCI-EXPANDED, CPCI-S Timespan=All years            |
| # 10 | 0       | TS=(lisa* near/1 tracker*)<br>Indexes=SCI-EXPANDED, CPCI-S Timespan=All years                                                 |
| # 9  | 32,262  | #8 OR #7 OR #6 OR #5 OR #4 OR #3 OR #2 OR #1<br>Indexes=SCI-EXPANDED, CPCI-S Timespan=All years                               |
| # 8  | 35      | TS=ADAb<br>Indexes=SCI-EXPANDED, CPCI-S Timespan=All years                                                                    |
| # 7  | 2,534   | TS=((anti* near/1 drug*) near/1 antibod*)<br>Indexes=SCI-EXPANDED, CPCI-S Timespan=All years                                  |

|     |        |                                                                                                                   |
|-----|--------|-------------------------------------------------------------------------------------------------------------------|
| # 6 | 4,072  | TS=((anti* near/1 tumo\$r*) near/1 (necrosis* near/1 factor*))<br>Indexes=SCI-EXPANDED, CPCI-S Timespan=All years |
| # 5 | 4,065  | TS=((anti-TNF* or antiTNF* or TNF*) near/2 inhibitor*)<br>Indexes=SCI-EXPANDED, CPCI-S Timespan=All years         |
| # 4 | 373    | TS=IFX<br>Indexes=SCI-EXPANDED, CPCI-S Timespan=All years                                                         |
| # 3 | 13,729 | TS=infliximab<br>Indexes=SCI-EXPANDED, CPCI-S Timespan=All years                                                  |
| # 2 | 8,006  | TS=ADA<br>Indexes=SCI-EXPANDED, CPCI-S Timespan=All years                                                         |
| # 1 | 4,973  | TS=adalimumab<br>Indexes=SCI-EXPANDED, CPCI-S Timespan=All years                                                  |

#### **Index to Theses, searched on 28/10/2014**

((adalimumab or infliximab or AntiTNF\* or Anti-TNF\* or "Anti TNF" or "Anti TNFa" or "Anti TNFalpha" or (TNF\* w/2 inhibitor\*) or (Anti-Tum\*r w/2 Necrosis) or ("anti drug" w/2 antibod\*) or ADAb) AND (crohn\* or "inflammatory bowel disease" or IBD))

14 document(s) retrieved

((adalimumab or infliximab or AntiTNF\* or Anti-TNF\* or "Anti TNF" or "Anti TNFa" or "Anti TNFalpha" or (TNF\* w/2 inhibitor\*) or (Anti-Tum\*r w/2 Necrosis) or "anti drug antibody" or "anti drug antibodies" or "anti-drug antibody" or "anti-drug antibodies" or ADAb) w/10 (monitor or monitoring or monitors or monitored or pharmacokinetic or pharmacokinetics or measure or measures or measurement or measuring or level or levels or concentration or concentrations)) AND ((correlate\* or correlation\* or associate\* or association\* or "test performance"))

4 document(s) retrieved

#### **DART-Europe, searched on 28/10/2014**

(adalimumab or infliximab or AntiTNF\* or Anti-TNF\* or "Anti TNF" or "Anti TNFa" or "Anti TNFalpha" or (TNF\* and inhibitor\*) or (Anti-Tum\*r and Necrosis) or ("anti drug" and antibod\*) or ADAb) and (crohn\* or "inflammatory bowel disease" or "inflammatory bowel diseases" or IBD)

113 document(s) retrieved

#### **Dissertations and Theses, searched on 29/10/2014**

all(((adalimumab or infliximab or AntiTNF\* or Anti-TNF\* or "Anti TNF" or "Anti TNFa" or "Anti TNFalpha" or (TNF\* n/2 inhibitor\*) or (Anti-Tum\*r n/2 Necrosis) or ("anti drug" n/2 antibod\*) or ADAb) AND (crohn\* or "inflammatory bowel disease" or "inflammatory bowel diseases" or IBD)))

all(((adalimumab or infliximab or AntiTNF\* or Anti-TNF\* or "Anti TNF" or "Anti TNFa" or "Anti TNFalpha" or (TNF\* n/2 inhibitor\*) or (Anti-Tum\*r n/2 Necrosis) or "anti drug antibody" or "anti drug antibodies" or "anti-drug antibody" or "anti-drug antibodies" or ADAb) n/10 (monitor or monitoring or monitors or monitored or pharmacokinetic or pharmacokinetics or measure or measures or measurement or measuring or level or levels or concentration or concentrations)) and (correlate\* or correlation\* or associate\* or association\* or "test performance"))

15

**NIHR HTA Programme, searched on 29/10/2014**

adalimumab

16

infliximab

23

TNF

17

**PROSPERO, searched on 29/10/2014**

adalimumab in All fields

OR

infliximab in All fields

OR

TNF\* inhibitor\* in All fields

OR

AntiTNF\* in All fields

OR

Anti-TNF\* in All fields

29 records

**ClinicalTrials.gov, searched on 04/11/2014**

Search Terms (any field): adalimumab OR infliximab OR (TNF AND (anti OR inhibitor OR blocker))

OR "anti drug antibody" OR "anti drug antibodies" OR ADAb

AND

Condition: crohn OR "inflammatory bowel disease" OR "inflammatory bowel diseases"

AND

Title: monitor OR pharmacokinetic OR measure OR measuring OR level OR concentration OR assay

14 studies

**Current Controlled Trials, searched on 04/11/2014**

(adalimumab OR infliximab OR TNF\* OR AntiTNF\* OR Anti-TNF\* OR anti drug antibod\* OR ADAb) AND (crohn\* OR inflammatory bowel disease\*) AND (monitor\* OR pharmacokinetic\* OR measure\* OR measuring OR level\* OR concentration\* OR assay\*)

30 studies

**UKCRN Portfolio Database, searched on 04/11/2014**

Specialty: Gastroenterology

Research Summary: adalimumab infliximab TNF AntiTNF Anti-TNF ADAb

‘Any’ selected (combines terms with Boolean OR)

4 studies

**WHO ICTRP, searched on 10/11/2014**

Advanced Search

In Title: adalimumab OR infliximab OR AntiTNF\* OR Anti-TNF\* OR TNF inhibitor\* OR TNF $\alpha$  inhibitor\* OR TNF alpha inhibitor\* OR TNFalpha inhibitor\* OR anti drug antibody OR anti drug antibodies OR ADAb

AND

In Condition: Crohn\* OR inflammatory bowel disease\*

AND

In Intervention: monitor\* OR pharmacokinetic\* OR measure\* OR measuring OR level\* OR concentration\* OR assay\*

39 trials found

## Supplement 2 Update search for new studies

Supplement 2 Figure 1 summarises the search update undertaken to identify new studies. There were 140 citations to the systematic reviews of Nanda et al. 2013 and Paul et al. 2014.[6 7]. Amongst these there were three recent systematic reviews,[48-50] which in turn yielded a further six unique citations. Within the three recent systematic reviews there were 35 unique primary studies. We screened all citations to the systematic reviews and all studies included in the new systematic reviews. [48-50]

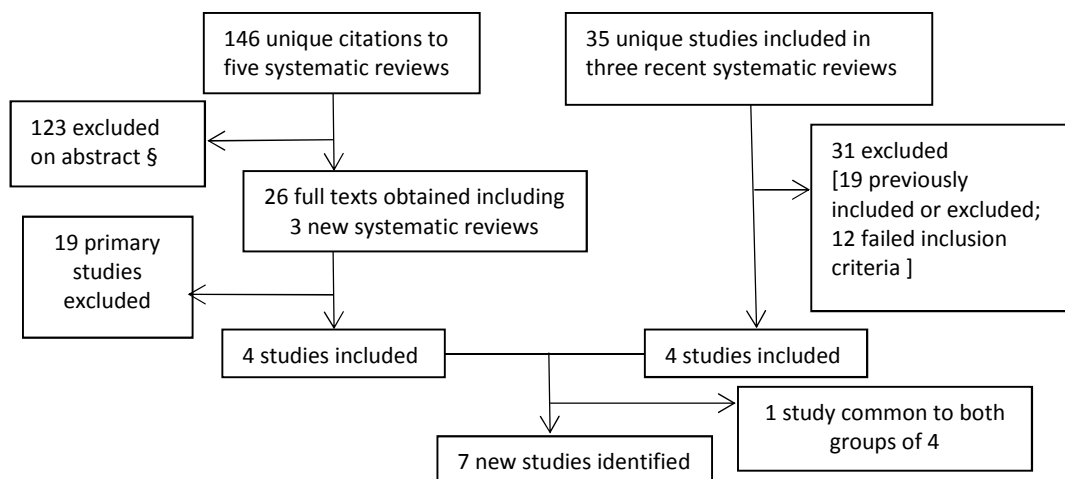

**Supplement 2 Figure 1 Study flow diagram.** (Excluded studies are identified in Supplement 2 Table 1)

Seven new studies satisfied our inclusion criteria, their main characteristics are summarised in Supplement 8 Table 1.

**Supplement 2 Table 1 List of excluded studies with reasons for exclusion**

|    | Studies excluded from those included in three recent systematic reviews | Reason for exclusion         |
|----|-------------------------------------------------------------------------|------------------------------|
| 1a | Adedokuun 2014<br>Gastroenterology. 2014;147:1296–1307.e5.              | all UC patients              |
| 2a | Ainsworth 2008<br>Am J Gastroenterol 2008;103(4):944-8                  | already included or excluded |
| 3a | Baert 2014<br>Clin Gastroenterol Hepatol 2014;12(9):1474-81.e2          | already included or excluded |
| 4a | Ben-Basset 2013<br>Gastroenterology 2013;144(5 Suppl):S-775             | already included or excluded |
| 5a | Bortlik 2013<br>Journal of Crohn's & colitis 2013;7(9):736-43           | already included or excluded |
| 6a | Vande Casteele 2015<br>Gastroenterology 2015;148:1320–9.e3.             | already included or excluded |
| 7a | Vande Casteele 2014<br>Gut. 2015;64:1539–1545.                          | 2x2 table not possible       |
| 8a | Vande Casteele 2013<br>Am J Gastroenterol.2013; 108:962–971.            | already included or excluded |
| 9a | Colombel 2014<br>Clin Gastroenterol Hepatol 12, 423                     | wrong drug                   |

|                                                                   |                      |                                                      |                              |
|-------------------------------------------------------------------|----------------------|------------------------------------------------------|------------------------------|
| 10a                                                               | Cornillie 2014       | Gut 2011;60:A296.                                    | already included or excluded |
| 11a                                                               | Daperno 2013         | Gastroenterology 2013;144:Tu1173.                    | too few CD patients          |
| 12a                                                               | Drastich 2011        | Gastroenterology 2011;140:S292.                      | already included or excluded |
| 13a                                                               | Drobne 2015          | Clin Gastroenterol Hepatol 2015;13:514–21.e4.        | 2x2 table not possible       |
| 14a                                                               | Echarri 2015         | J Crohns Colitis. 2015;9:S342–aS343.                 | 2x2 table not possible       |
| 15a                                                               | Hibi 2014            | J Gastroenterol 2014;49:254–62.                      | already included or excluded |
| 16a                                                               | Imaeda 2014          | J Gastroenterol.2014;49:100–109.                     | already included or excluded |
| 17a                                                               | Imaeda 2014          | J Gasroenterology 49;674-682                         | 2x2 table not possible       |
| 18a                                                               | Marits 2014          | J Crohns Colitis. 2014;8:881–889.                    | 2x2 table not possible       |
| 19a                                                               | Maser 2006           | Clin Gastroenterol Hepatol 2006;4(10):1248-54        | already included or excluded |
| 20a                                                               | Mazor 2014           | Aliment Pharmacol Ther. 2014;40:620–628.             | already included or excluded |
| 21a                                                               | Murthy 2012          | Gastroenterology 2012;142:S388.                      | all UC patients              |
| 22a                                                               | Papamichail 2015     | Gastroenterology. 2015;148: S848.                    | all UC patients              |
| 23a                                                               | Pariante 2012        | Inflamm Bowel Dis 2012;18:1199–206.                  | already included or excluded |
| 24a                                                               | Paul 2013            | Inflamm Bowel Dis 2013;19:2568–76.                   | too few CD patients          |
| 25a                                                               | Roblin 2014          | Clin Gastroenterol Hepatol. 2014;12:80–84.e2.        | already included or excluded |
| 26a                                                               | Roblin 2015          | Drug Levels & Biomarkers. 2015;148:S–853.            | 2x2 table not possible       |
| 27a                                                               | Ron 2012             | Gastroenterology 2012;142:S385.                      | 2x2 table not possible       |
| 28a                                                               | Seow 2010            | Gut 2010;59:49–54                                    | all UC patients              |
| 29a                                                               | Singh 2014           | Inflamm Bowel Dis. 2014;20:1708–1713.                | already included or excluded |
| 30a                                                               | Steenholdt 2011      | Scand J Gastroenterol 2011;46:310–8.                 | already included or excluded |
| 31a                                                               | Tang 2014            | J Crohns Colitis. 2014;8:S209–S210.                  | already included or excluded |
| <b>Studies excluded from citations to five systematic reviews</b> |                      |                                                      | <b>Reason for exclusion</b>  |
| 1                                                                 | Vande Casteele 2013  | American Journal of Gastroenterology 108(6): 962-971 | See 8a                       |
| 2                                                                 | Bodini 2014          | Digestive and Liver Disease 46(11): 1043-1046.       | already included or excluded |
| 3                                                                 | Imaeda 2014          | Journal of Gastroenterology 49(4): 674-682           | See 17a                      |
| 4                                                                 | Marits 2014          | Journal of Crohn's and Colitis 8(8): 881-889         | See 18a                      |
| 5                                                                 | Pallagi-Kunstár 2014 | World Journal of                                     | already included or excluded |

|    |                        |                                                                    |                              |
|----|------------------------|--------------------------------------------------------------------|------------------------------|
|    |                        | Gastroenterology 20(17): 5031-5035                                 |                              |
| 6  | Rivero Marcotegui 2014 | Revista del Laboratorio Clinico 7(2): 68-72                        | already included or excluded |
| 7  | Roblin 2014            | Clinical Gastroenterology and Hepatology 12(1): 80-84.e82          | See 25a                      |
| 8  | Singh 2014             | Inflammatory Bowel Diseases 20(10): 1708-1713                      | See 29a                      |
| 9  | Steenholdt 2014        | American Journal of Gastroenterology 109(7): 1055-1064             | already included or excluded |
| 10 | Steenholdt 2014        | Gut 63(6): 919-927                                                 | already included or excluded |
| 11 | Ungar                  | Gut 63(8): 1258-1264                                               | already included or excluded |
| 12 | Vaughn 2014            | Inflammatory Bowel Diseases 20(11): 1996-2003                      | already included or excluded |
| 13 | Vande Casteele 2015    | Gut 64(10): 1539-1545                                              | 2x2 table not possible       |
| 14 | Roblin 2015            | Journal of Crohn's and Colitis 9(7): 525-531                       | too few CD patients          |
| 15 | Van Stappen 2015       | Inflammatory Bowel Diseases 21(9): 2172-2177                       | 2x2 table not possible       |
| 16 | Warman 2015            | European Journal of Gastroenterology and Hepatology 27(3): 242-248 | too few CD patients          |
| 17 | Yanai 2015             | Clinical Gastroenterology and Hepatology 13(3): 522-530            | 2x2 table not possible       |
| 18 | Yarur 2015             | Clinical Gastroenterology and Hepatology 13(6): 1118-1124.e1113    | too few CD patients          |
| 19 | Bodini 2016            | Scandinavian Journal of Gastroenterology 51(9): 1081-1086          | 2x2 table not possible       |



### Supplement 3 Funnel plots and tests for publication bias

In the meta-analysis of tests for trough Infliximab levels using funnel plots and Harbord's and Peter's tests for small study bias in diagnostic odds ratios [1, 2] we found no evidence of small study bias in diagnostic odds ratios: Harbord test  $p = 0.312$ , Peters test  $p = 0.576$ . The corresponding values for tests of antibodies against Infliximab were  $p = 0.734$  and  $p = 0.780$ .

#### Antibodies to Infliximab

##### 1] Funnel plot

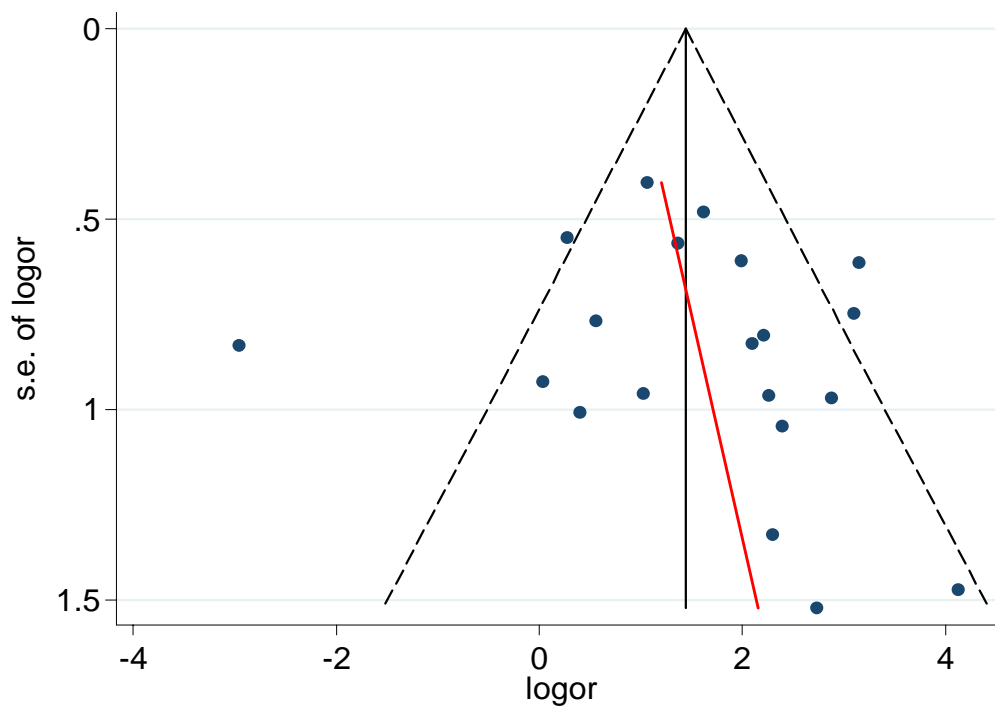

##### 2] Egger's test for small-study effects:

Number of studies = 20

Eggers test

slope | .8614847 .8816692 0.98 0.341 -.9908337 2.713803

bias | .8517858 1.21317 0.70 0.492 -1.69699 3.400561

Test of H0: no small-study effects **P = 0.492**

Does not support publication bias.

1. Harbord R, Harris RJ, Sterne JAC. Updated tests for small-study effects in meta-analyses. *Stata Journal* 2009;9(2):197-210

2. Macaskill P, Gatsonis C, Deeks J, et al. Chapter 10: Analysing and Presenting Results. In: Deeks JJ, Bossuyt PM, Gatsonis C, eds. *Cochrane Handbook for Systematic Reviews of Diagnostic Test Accuracy Version 10: The Cochrane Collaboration*, 2010.

### 3) Harbord plot

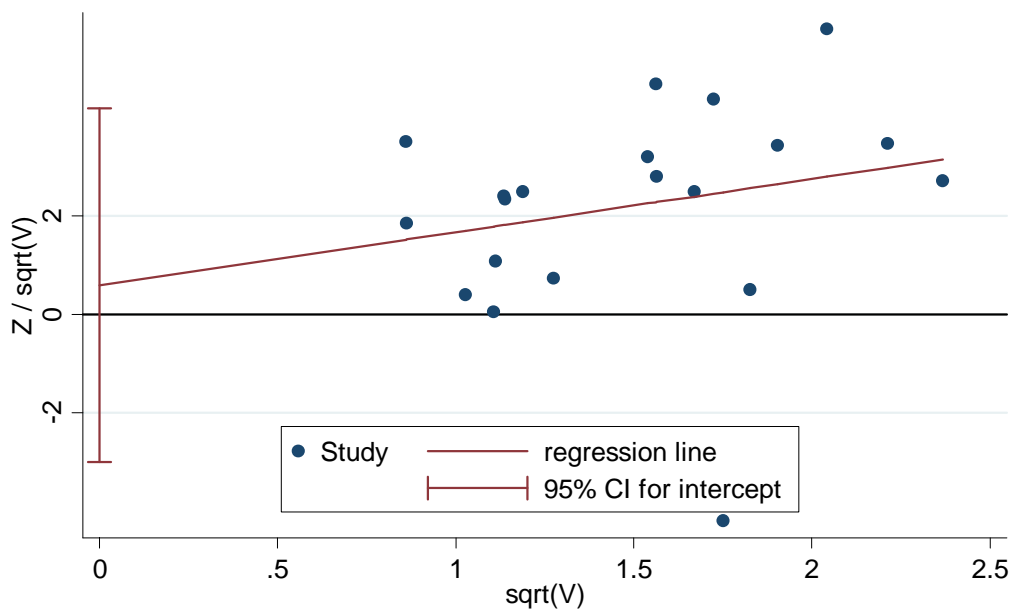

### 4) Harbord's modified test for small-study effects:

Number of studies = 20      Root MSE = 2.125  
 Z/sqrt(V) | Coef. Std. Err. t P>|t| [95% Conf. Interval]  
 -----+-----  
 sqrt(V) | 1.079732 1.099815 0.98 0.339 -1.230893 3.390356  
 bias | .5901862 1.710314 0.35 0.734 -3.003051 4.183424  
 -----+-----

Test of H0: no small-study effects    **P = 0.734**

### 5) Peter's test for small-study effects:

Number of studies = 18      Root MSE = 1.459  
 Std\_Eff | Coef. Std. Err. t P>|t| [95% Conf. Interval]  
 bias | -8.626685 30.41227 -0.28 0.780 -73.09781 55.84444  
 constant | 1.674552 .6008762 2.79 0.013 .400751 2.948352  
 Test of H0: no small-study effects    **P = 0.780**

## Trough Infliximab tests

### 1] Funnel plot

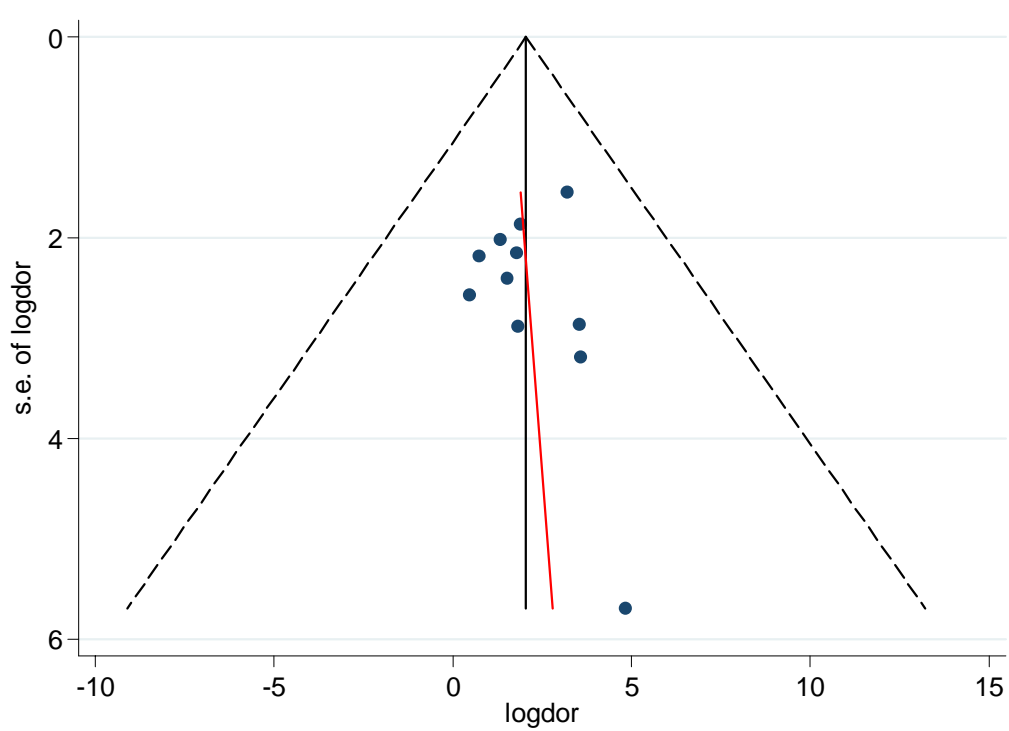

2] Egger's test for small-study effects:  
Regress standard normal deviate of intervention  
effect estimate against its standard error

Number of studies = 11      Root MSE = 1.907  
Std\_Eff | Coef. Std. Err. t P>|t| [95% Conf. Interval]  
slope | 1.580826 1.251978 1.26 0.238 -1.251345 4.412998  
bias | .8249369 2.088696 0.39 0.702 -3.900021 5.549894  
Test of H0: no small-study effects    **P = 0.702**

### 3) Harbord plot

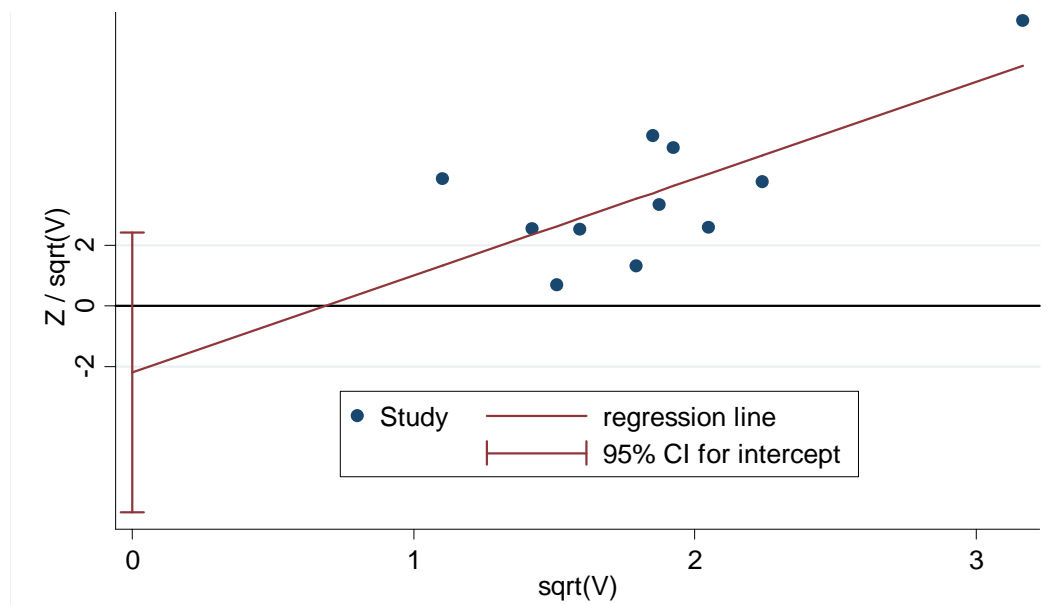

### 4) Harbord's modified test for small-study effects:

Regress  $Z/\sqrt{V}$  on  $\sqrt{V}$  where  $Z$  is efficient score and  $V$  is score variance

Number of studies = 11      Root MSE = 1.779

Test of  $H_0$ : no small-study effects     $P = 0.312$

### 5) Peter's test for small-study effects:

Regress intervention effect estimate on  $1/N_{tot}$ , with weights  $S \times F/N_{tot}$

Number of studies = 11      Root MSE = 1.191

| Std_Eff  | Coef.     | Std. Err. | t     | P> t  | [95% Conf. Interval] |
|----------|-----------|-----------|-------|-------|----------------------|
| bias     | -28.29877 | 48.81199  | -0.58 | 0.576 | -138.7192 82.12163   |
| constant | 2.738445  | .725501   | 3.77  | 0.004 | 1.097248 4.379642    |

Test of  $H_0$ : no small-study effects     $P = 0.576$

## Supplement 4 Excluded studies with reason

Supplement 4 Table 1 Full text exclusions with reason

| Reference                                                                                                                                                                                                                                                                                                                               | Reason for exclusion                                               |
|-----------------------------------------------------------------------------------------------------------------------------------------------------------------------------------------------------------------------------------------------------------------------------------------------------------------------------------------|--------------------------------------------------------------------|
| 1. Afif, W., E. V. Loftus, Jr., W. A. Faubion, S. V. Kane, D. H. Bruining, K. A. Hanson and W. J. Sandborn (2010). "Clinical utility of measuring infliximab and human anti-chimeric antibody concentrations in patients with inflammatory bowel disease." <u>American Journal of Gastroenterology</u> 105(5): 1133-1139.               | Insufficient data                                                  |
| 2. Baert, F., M. Noman, S. Vermeire, G. Van Assche, D. H. G, A. Carbonez and P. Rutgeerts (2003). "Influence of immunogenicity on the long-term efficacy of infliximab in Crohn's disease." <u>N Engl J Med</u> 348(7): 601-608.                                                                                                        | Insufficient data                                                  |
| 3. Balzola, F., C. Bernstein, G. T. Ho and C. Lees (2010). "Clinical utility of measuring infliximab and human antichimeric antibody concentrations in patients with inflammatory bowel disease: Commentary." <u>Inflammatory Bowel Disease Monitor</u> 11(2): 85-86.                                                                   | Commentary no original data                                        |
| 4. Balzola, F., G. Cullen, G. T. Ho and R. K. Russell (2013). "Clinical utility of newly developed immunoassays for serum concentrations of adalimumab and anti-adalimumab antibodies in patients with Crohn's disease." <u>Inflammatory Bowel Disease Monitor</u> 14(1): 19.                                                           | Commentary no original data                                        |
| 5. Ben-Horin, S. and Y. Chowers (2011). "Review article: loss of response to anti-TNF treatments in Crohn's disease." <u>Aliment Pharmacol Ther</u> 33(9): 987-995.                                                                                                                                                                     | Review without MA                                                  |
| 6. Billioud, V., W. J. Sandborn and L. Peyrin-Biroulet (2011). "Loss of response and need for adalimumab dose intensification in Crohn's disease: a systematic review." <u>American Journal of Gastroenterology</u> 106(4): 674-684.                                                                                                    | SR without MA                                                      |
| 7. Cassinotti A, Travis S. Incidence and clinical significance of immunogenicity to infliximab in Crohn's disease: a critical systematic review. <u>Inflamm Bowel Dis</u> . 2009;15(8):1264-75.                                                                                                                                         | Review without MA                                                  |
| 8. Chaparro, M., I. Guerra, P. Munoz-Linares and J. P. Gisbert (2012). "Systematic review: antibodies and anti-TNF-alpha levels in inflammatory bowel disease." <u>Aliment Pharmacol Ther</u> 35(9): 971-986.                                                                                                                           | SR without MA                                                      |
| 9. Colombel JF, Feagan BG, Sandborn WJ, Van Assche G, Robinson AM. Therapeutic drug monitoring of biologics for inflammatory bowel disease. 2012;18(2):349-58.                                                                                                                                                                          | Review without MA                                                  |
| 10. Corstjens PL, Fidler HH, Wiesmeijer KC, et al. A rapid assay for on-site monitoring of infliximab trough levels: a feasibility study. <u>Anal Bioanal Chem</u> 2013;405(23):7367-75 doi: <a href="http://dx.doi.org/10.1007/s00216-013-7154-0">http://dx.doi.org/10.1007/s00216-013-7154-0</a> [published Online First: Epub Date]. | Insufficient data                                                  |
| 11. Ebert, E. C., K. M. Das, V. Mehta and C. Rezac (2008). "Non-response to infliximab may be due to innate neutralizing anti-tumour necrosis factor-alpha antibodies." <u>Clinical &amp; Experimental Immunology</u> 154(3): 325-331.                                                                                                  | Measurement of antibodies to TNF-alpha not anti-TNF $\alpha$ drugs |
| 12. Garces, S., J. Demengeot and E. Benito-Garcia (2013). "The immunogenicity of anti-TNF therapy in immune-mediated inflammatory diseases: a systematic review of the literature with a meta-analysis." <u>Annals of the Rheumatic Diseases</u> 72(12): 1947-1955.                                                                     | >50% RA patients                                                   |

|                                                                                                                                                                                                                                                                                                                                                                                                                                                                         |                     |
|-------------------------------------------------------------------------------------------------------------------------------------------------------------------------------------------------------------------------------------------------------------------------------------------------------------------------------------------------------------------------------------------------------------------------------------------------------------------------|---------------------|
| 13. Hamalainen, A., T. Sipponen and K. L. Kolho (2013). "Serum infliximab concentrations in pediatric inflammatory bowel disease." <i>Scandinavian Journal of Gastroenterology</i> 48(1): 35-41.                                                                                                                                                                                                                                                                        | Insufficient data   |
| 14. Hibi, T., A. Sakuraba, M. Watanabe, S. Motoya, H. Ito, K. Motegi, Y. Kinouchi, M. Takazoe, Y. Suzuki, T. Matsumoto, K. Kawakami, T. Matsumoto, I. Hirata, S. Tanaka, T. Ashida and T. Matsui (2012). "Retrieval of serum infliximab level by shortening the maintenance infusion interval is correlated with clinical efficacy in Crohn's disease." <i>Inflamm Bowel Dis</i> 18(8): 1480-1487.                                                                      | Insufficient data   |
| 15. Imaeda H, Bamba S, Takahashi K, et al. Relationship between serum infliximab trough levels and endoscopic activities in patients with Crohn's disease under scheduled maintenance treatment. <i>J Gastroenterol</i> 2014;49(4):674-82 doi: <a href="http://dx.doi.org/10.1007/s00535-013-0829-7">http://dx.doi.org/10.1007/s00535-013-0829-7</a> [published Online First: Epub Date]].                                                                              | Insufficient data   |
| 16. Karmiris K, Paintaud G, Noman M, et al. Influence of trough serum levels and immunogenicity on long-term outcome of adalimumab therapy in Crohn's disease. <i>Gastroenterology</i> 2009;137(5):1628-40 doi: <a href="http://dx.doi.org/10.1053/j.gastro.2009.07.062">http://dx.doi.org/10.1053/j.gastro.2009.07.062</a> [published Online First: Epub Date]].                                                                                                       | Insufficient data   |
| 17. Khanna, R., B. D. Sattin, W. Afif, E. I. Benchimol, E. J. Bernard, A. Bitton, B. Bressler, R. N. Fedorak, S. Ghosh, G. R. Greenberg, J. K. Marshall, R. Panaccione, E. G. Seidman, M. S. Silverberg, A. H. Steinhart, R. Sy, G. Van Assche, T. D. Walters, W. J. Sandborn and B. G. Feagan (2013). "Review article: a clinician's guide for therapeutic drug monitoring of infliximab in inflammatory bowel disease." <i>Aliment Pharmacol Ther</i> 38(5): 447-459. | SR without MA       |
| 18. Lazebnik, L. B. and V. E. Sagynbaeva (2013). "[Level of adalimumab and its antibody titers define the effectiveness of the biological (anticytokine) therapy in Crohn's disease]." <i>Eksperimental'Naia i Klinicheskaia Gastroenterologiya</i> (7): 18-22.                                                                                                                                                                                                         | Non-English         |
| 19. Levesque BG, Greenberg GR, Zou G, et al. A prospective cohort study to determine the relationship between serum infliximab concentration and efficacy in patients with luminal Crohn's disease. <i>Aliment Pharmacol Ther</i> 2014;39(10):1126-35 doi: <a href="http://dx.doi.org/10.1111/apt.12733">http://dx.doi.org/10.1111/apt.12733</a> [published Online First: Epub Date]].                                                                                  | Insufficient data   |
| 20. Lichtenstein, G. R. (2013). "Comprehensive review: antitumor necrosis factor agents in inflammatory bowel disease and factors implicated in treatment response." <i>Therapeutic Advances in Gastroenterology</i> 6(4): 269-293.                                                                                                                                                                                                                                     | SR without MA       |
| 21. Malickova, K., D. Duricova, M. Bortlik, N. Machkova, I. Janatkova and M. Lukas (2011). "Serum infliximab trough levels and induction of antibodies to infliximab during the biological treatment of patients with inflammatory bowel diseases. [Czech]Serove hladiny infliximabu a indukce tvorby protilatek proti infliximabu pri biologicke lecbe nemocnych s idiopatickymi strevnimi zanety." <i>Alergie</i> 13(3): 216-222.                                     | Non-English         |
| 22. Marits P, Landucci L, Sundin U, et al. Trough s-infliximab and antibodies towards infliximab in a cohort of 79 IBD patients with maintenance infliximab treatment. <i>Journal of Crohn's &amp; colitis</i> 2014;8(8):881-9 doi: <a href="http://dx.doi.org/10.1016/j.crohns.2014.01.009">http://dx.doi.org/10.1016/j.crohns.2014.01.009</a> [published Online First: Epub Date]].                                                                                   | Insufficient data   |
| 23. Pallagi-Kunstar E, Farkas K, Szepes Z, et al. Utility of serum TNF-alpha, infliximab trough level, and antibody titers in inflammatory bowel disease. <i>World J Gastroenterol</i> 2014;20(17):5031-5 doi: <a href="http://dx.doi.org/10.3748/wjg.v20.i17.5031">http://dx.doi.org/10.3748/wjg.v20.i17.5031</a> [published Online First: Epub Date]].                                                                                                                | Insufficient data   |
| 24. Paul S, Del Tedesco E, Marotte H, et al. Therapeutic drug monitoring of infliximab and mucosal healing in inflammatory bowel disease: a prospective study. <i>Inflamm Bowel Dis</i> 2013;19(12):2568-76 doi: <a href="http://dx.doi.org/10.1097/MIB.0b013e3182a77b41">http://dx.doi.org/10.1097/MIB.0b013e3182a77b41</a> [published Online First: Epub Date]].                                                                                                      | Insufficient data   |
| 25. Rivero Marcotegui, A., R. Ibanez Bosch, A. Zuniga Vera, A. Arin Letamendia and M. J. Burusco Paternain (2014). "Clinical usefulness in measuring infliximab and human anti-chimeric antibodies. [Spanish]Utilidad clinica de la cuantificacion de infliximab y anticuerpos antiqimericos humanos." <i>Revista del</i>                                                                                                                                               | patients >50%<br>RA |

|                                                                                                                                                                                                                                                                                                                                                                                                                                                                                 |                   |
|---------------------------------------------------------------------------------------------------------------------------------------------------------------------------------------------------------------------------------------------------------------------------------------------------------------------------------------------------------------------------------------------------------------------------------------------------------------------------------|-------------------|
| Laboratorio Clinico 7(2): 68-72.                                                                                                                                                                                                                                                                                                                                                                                                                                                |                   |
| 26. Roblin, X., M. Rinaudo, E. Del Tedesco, J. M. Phelip, C. Genin, L. Peyrin-Biroulet and S. Paul (2014). "Development of an algorithm incorporating pharmacokinetics of adalimumab in inflammatory bowel diseases." <i>American Journal of Gastroenterology</i> 109(8): 1250-1256.                                                                                                                                                                                            | Insufficient data |
| 27. Ruiz-Arguello B, del Agua AR, Torres N, et al. Comparison study of two commercially available methods for the determination of infliximab, adalimumab, etanercept and anti-drug antibody levels. <i>Clin Chem Lab Med</i> 2013;51(12):e287-9 doi: 10.1515/cclm-2013-0461[published Online First: Epub Date]].                                                                                                                                                               | Insufficient data |
| 28. Rutgeerts, P., G. D'Haens, S. Targan, E. Vasiliauskas, S. B. Hanauer, D. H. Present, L. Mayer, R. A. Van Hogezaand, T. Braakman, K. L. DeWoody, T. F. Schaible and S. J. Van Deventer (1999). "Efficacy and safety of retreatment with anti-tumor necrosis factor antibody (infliximab) to maintain remission in Crohn's disease." <i>Gastroenterology</i> 117(4): 761-769.                                                                                                 | Insufficient data |
| 29. Schatz SB, Prell C, Freudenberg F, et al. PA-G-0035 Comparison of different tests for determination of infliximab levels and antibodies against infliximab in pediatric IBD patients. The 46th Annual Meeting of The European Society of Paediatric Gastroenterology, Hepatology and Nutrition. <i>J Pediatr Gastroenterol Nutr</i> 2013;56 suppl 2:19                                                                                                                      | Insufficient data |
| 30. Singh N, Rosenthal CJ, Melmed GY, et al. Early infliximab trough levels are associated with persistent remission in pediatric patients with inflammatory bowel disease. <i>Inflamm Bowel Dis</i> 2014;20(10):1708-13 doi: <a href="http://dx.doi.org/10.1097/MIB.000000000000137">http://dx.doi.org/10.1097/MIB.000000000000137</a> [published Online First: Epub Date]].                                                                                                   | Insufficient data |
| 31. Sono, K., A. Yamada, Y. Yoshimatsu, N. Takada and Y. Suzuki (2012). "Factors associated with the loss of response to infliximab in patients with Crohn's disease." <i>Cytokine</i> 59(2): 410-416.                                                                                                                                                                                                                                                                          | Insufficient data |
| 32. Steenholdt C, Ainsworth MA, Tovey M, et al. Comparison of techniques for monitoring infliximab and antibodies against infliximab in Crohn's disease. <i>Ther Drug Monit</i> 2013;35(4):530-8 doi: <a href="http://dx.doi.org/10.1097/FTD.0b013e31828d23c3">http://dx.doi.org/10.1097/FTD.0b013e31828d23c3</a> [published Online First: Epub Date]].                                                                                                                         | Insufficient data |
| 33. Steenholdt C, Bendtzen K, Brynskov J, et al. Clinical implications of measuring drug and anti-drug antibodies by different assays when optimizing infliximab treatment failure in Crohn's disease: post hoc analysis of a randomized controlled trial. <i>Am J Gastroenterol</i> 2014;109(7):1055-64 doi: <a href="http://dx.doi.org/10.1038/ajg.2014.106">http://dx.doi.org/10.1038/ajg.2014.106</a> [published Online First: Epub Date]].                                 | Insufficient data |
| 34. Steenholdt C BJ, Thomsen OØ, Munck LK, Fallingborg J, Christensen LA, Pedersen G, Kjeldsen J, Jacobsen BA, Oxholm AS, Kjellberg J, Bendtzen K, Ainsworth MA. Individualized therapy is a Long-Term Cost-Effective Method Compared to Dose Intensification in Crohn's Disease Patients Failing Infliximab. <i>Dig Dis Sci</i> 2015; Published Online First on 12 Feb 2015. doi:10.1007/s10620-015-3581-4 doi: 10.1007/s10620-015-3581-4[published Online First: Epub Date]]. | Insufficient data |
| 35. Steenholdt, C., M. Svenson, K. Bendtzen, O. O. Thomsen, J. Brynskov and M. A. Ainsworth (2011). "Severe infusion reactions to infliximab: aetiology, immunogenicity and risk factors in patients with inflammatory bowel disease." <i>Aliment Pharmacol Ther</i> 34(1): 51-58.                                                                                                                                                                                              | Insufficient data |
| 36. Ungar, B., Y. Chowers, M. Yavzori, O. Picard, E. Fudim, O. Har-Noy, U. Kopylov, R. Eliakim, S. Ben-Horin and A. consortium (2014). "The temporal evolution of antidrug antibodies in patients with inflammatory bowel disease treated with infliximab." <i>Gut</i> 63(8): 1258-1264.                                                                                                                                                                                        | Insufficient data |
| 37. Van Assche, G., C. Magdelaine-Beuzelin, G. D'Haens, F. Baert, M. Noman, S. Vermeire, D. Ternant, H. Watier, G. Paintaud and P. Rutgeerts (2008). "Withdrawal of immunosuppression in Crohn's disease treated with scheduled infliximab maintenance: a randomized trial." <i>Gastroenterology</i> 134(7): 1861-1868.                                                                                                                                                         | Insufficient data |

|                                                                                                                                                                                                                                                                                                                                                                                                                                       |                   |
|---------------------------------------------------------------------------------------------------------------------------------------------------------------------------------------------------------------------------------------------------------------------------------------------------------------------------------------------------------------------------------------------------------------------------------------|-------------------|
| 38. Vande Casteele N, Buurman DJ, Sturkenboom MG, et al. Detection of infliximab levels and anti-infliximab antibodies: a comparison of three different assays. <i>Aliment Pharmacol Ther</i> 2012;36(8):765-71 doi: <a href="http://dx.doi.org/10.1111/apt.12030">http://dx.doi.org/10.1111/apt.12030</a> [published Online First: Epub Date].                                                                                       | Insufficient data |
| 39. Vande Casteele N, Ferrante M, Van Assche G, et al. Trough Concentrations of Infliximab Guide Dosing for Patients with Inflammatory Bowel Disease. <i>Gastroenterology</i> Forthcoming 2015 doi: 10.1053/j.gastro.2015.02.031[published Online First: Epub Date].                                                                                                                                                                  | Insufficient data |
| 40. Vaughn BP, Martinez-Vazquez M, Patwardhan VR, et al. Proactive therapeutic concentration monitoring of infliximab may improve outcomes for patients with inflammatory bowel disease: results from a pilot observational study. <i>Inflamm Bowel Dis</i> 2014;20(11):1996-2003 doi: <a href="http://dx.doi.org/10.1097/MIB.000000000000156">http://dx.doi.org/10.1097/MIB.000000000000156</a> [published Online First: Epub Date]. | Insufficient data |
| 41. Vermeire, S., M. Noman, G. Van Assche, F. Baert, G. D'Haens and P. Rutgeerts (2007). "Effectiveness of concomitant immunosuppressive therapy in suppressing the formation of antibodies to infliximab in Crohn's disease." <i>Gut</i> 56(9): 1226-1231.                                                                                                                                                                           | Insufficient data |
| 42. Wang SL, Ohrmund L, Hauenstein S, et al. Development and validation of a homogeneous mobility shift assay for the measurement of infliximab and antibodies-to-infliximab levels in patient serum. <i>J Immunol Methods</i> 2012;382(1-2):177-88 doi: <a href="http://dx.doi.org/10.1016/j.jim.2012.06.002">http://dx.doi.org/10.1016/j.jim.2012.06.002</a> [published Online First: Epub Date].                                   | Insufficient data |
| 43. Yamada, A., K. Sono, N. Hosoe, N. Takada and Y. Suzuki (2010). "Monitoring functional serum antitumor necrosis factor antibody level in Crohn's disease patients who maintained and those who lost response to anti-TNF." <i>Inflamm Bowel Dis</i> 16(11): 1898-1904.                                                                                                                                                             | Insufficient data |
| 44. Yanai H, Hanauer SB. Assessing response and loss of response to biological therapies in IBD. <i>Am JGastroenterol.</i> 2011;106(4):685-98                                                                                                                                                                                                                                                                                         | Review without MA |

Supplement 4 Table 2 Excluded abstracts with reason

| Reference                                                                                                                                                                                                                                                                                          | Reason for exclusion       |
|----------------------------------------------------------------------------------------------------------------------------------------------------------------------------------------------------------------------------------------------------------------------------------------------------|----------------------------|
| 45. Abraham, B. and M. Chiorean (2012). "False positive infliximab levels detected in patients treated with adalimumab for inflammatory bowel disease." <i>American Journal of Gastroenterology</i> 107: S627                                                                                      | Insufficient data          |
| 46. Afif, W., E. V. Loftus, W. A. Faubion, K. A. Hanson and W. J. Sandborn (2009). "Clinical utility of measuring infliximab and human anti-chimeric antibody levels in patients with inflammatory bowel disease." <i>Gastroenterology</i> 1): A147.                                               | Superseded by full text    |
| 47. Anonymous (2012). "New Assay Can Detect Infliximab Levels and Anti-Infliximab Antibodies From a Single Serum Sample." <i>Clinical Advances in Hematology and Oncology</i> 10 (10): 27.                                                                                                         | Editorial no original data |
| 48. Armbruster, S., M. Ally, C. Maydonovitch, J. Betteridge and G. Veerappan (2012). "The use of human anti-chimeric antibody (HACA) and infliximab levels in the management of inflammatory bowel disease." <i>American Journal of Gastroenterology</i> 107: S641.                                | Insufficient data          |
| 49. Arranz, M. D. M., E. M. Arranz, D. P. Salcedo, C. De Diego, S. G. Senent, J. P. Cordon, B. B. Garcia and J. M. S. Parga (2014). "Infliximab trough levels and antibodies: Relationship with infusion reaction, immunomodulators and biological parameters." <i>Gastroenterology</i> 1): S-243. | Insufficient data          |
| 50. Baert, F. J., D. Drobne, V. Ballet, I. Cleynen, G. Compernelle, P. J. Rutgeerts, G. A. Van Assche, A. Gils and S. Vermeire (2011). "Early trough                                                                                                                                               | Insufficient data          |



|                                                                                                                                                                                                                                                                                                                                                             |                         |
|-------------------------------------------------------------------------------------------------------------------------------------------------------------------------------------------------------------------------------------------------------------------------------------------------------------------------------------------------------------|-------------------------|
| levels and antibodies predict safety and success of restarting infliximab after long drug holiday." <u>Gastroenterology</u> 1): S62.                                                                                                                                                                                                                        |                         |
| 51. Baert, F. J., S. Lockton, S. Hauenstein, S. Singh, A. Gils and S. Vermeire (2014). "Antibodies to adalimumab predict inflammation in crohn's patients on maintenance adalimumab therapy." <u>Gastroenterology</u> 1): S-242                                                                                                                             | Insufficient data       |
| 52. Ben-Bassat, O., S. Hauenstein, A. Iacono, S. P. Irwin, S. Singh and G. R. Greenberg (2013). "Serum adalimumab and immunogenicity in IBD patients after 80mg biweekly maintenance therapy." <u>Gastroenterology</u> 1): S771.                                                                                                                            | Insufficient data       |
| 53. Ben-Horin, S., B. Ungar, Y. Chowers, M. Yavzori, O. Picard, E. Fudim and R. Eliakim (2013). "The temporal evolution of anti-drug antibodies in IBD patients treated with infliximab." <u>Journal of Gastroenterology and Hepatology</u> 28: 145.                                                                                                        | Insufficient data       |
| 54. Bodini, G., V. Savarino, P. Dulbecco, I. Baldissarro and E. Savarino (2014). "TNF-alpha levels strongly correlated with disease activity based on HBI and CDEIS in patients with crohn's disease in maintenance treatment with adalimumab." <u>Gastroenterology</u> 1): S-238.                                                                          | Insufficient data       |
| 55. Bodini, G., V. Savarino, P. Dulbecco, I. Baldissarro and E. Savarino (2014). "The influence of anti-adalimumab antibodies on adalimumab trough levels, TNF-alpha levels and clinical outcome." <u>Journal of Crohn's and Colitis</u> 8: S42.                                                                                                            | Insufficient data       |
| 56. Bodini, G., V. Savarino, P. Dulbecco, I. Baldissarro and E. V. Savarino (2014). "Elisa vs. HMSA: A comparison between two different methods for measuring adalimumab serum concentration and anti-adalimumab antibodies-preliminary data." <u>Digestive and Liver Disease</u> 46: S67.                                                                  | Duplicate               |
| 57. Bodini, G., V. Savarino, P. Dulbecco, L. Assandri, L. Bruzzzone, F. Mazza, V. Fazio, E. Giamb Bruno, L. Gemignani and E. Savarino (2013). "Correlation between adalimumab trough serum concentration, anti-adalimumab antibodies and TNF-alpha levels with clinical outcome in patients affected by crohn's disease." <u>Gastroenterology</u> 1): S780. | Insufficient data       |
| 58. Bodini, G., V. Savarino, V. Fazio, L. Assandri, L. Gemignani, P. Dulbecco, E. Giamb Bruno and E. Savarino (2012). "Relationship between drug serum concentration and clinical activity in patients with Crohn's Disease who achieved remission with adalimumab." <u>Digestive and Liver Disease</u> 44: S69-S70.                                        | Duplicate               |
| 59. Bodini, G., V. Savarino, V. Fazio, L. Assandri, P. Dulbecco, L. Gemignani and E. Savarino (2012). "Relationship between drug serum concentration and clinical activity in patients with crohn disease who achieved remission with adalimumab-a prospective study." <u>Gastroenterology</u> 1): S388.                                                    | Insufficient data       |
| 60. Bortlik, M., D. Duricova, K. Malickova, A. Komarek, N. Machkova, E. Bouzkova, L. Hrdlicka and M. Lukas (2012). "Infliximab trough levels may predict sustained response to infliximab in patients with Crohn's disease: A single cohort study." <u>Journal of Crohn's and Colitis</u> 6: S153.                                                          | Superseded by full text |
| 61. Cardile, S., A. Costa, I. Loddo, G. Morabito, C. Pidone and C. Romano (2013). "Impact of measurement of infliximab and anti-infliximab antibodies levels in pediatric inflammatory bowel disease." <u>Digestive and Liver Disease</u> 45: e294-e295.                                                                                                    | Insufficient data       |
| 62. Chauhan, U., U. Dutta, D. Armstrong, E. Greenwald, J. Marshall, F. Tse, T. Xenodemetropoulos and H. Smita (2012). "Does measuring infliximab and human anti-chimeric antibody concentrations in patients with inflammatory bowel disease impact clinical management? A canadian experience." <u>Inflamm Bowel Dis</u> 18: S82-S83                       | Insufficient data       |
| 63. Chauhan, U., U. Dutta, D. Armstrong, J. Marshall, F. Tse, E. Greenwald, T. Xenodemetropoulos and S. Halder (2013). "Does measuring IFX and human anti-chimeric antibody concentrations in patients with inflammatory bowel disease impact clinical management? A Canadian experience." <u>Journal of Crohn's and Colitis</u> 7: S228.                   | Duplicate               |
| 64. Chollet-Martin, S., P. Nicaise-Roland, L. De Chaisemartin, S. Grootenboer-Mignot, G. Hayem, A. L. Pelletier, A. Amiot, V. Descamps, Y. Bouhnik and O. Meyer (2013). "Simultaneous determination of anti-infliximab antibodies                                                                                                                           | Insufficient data       |

|                                                                                                                                                                                                                                                                                                                                                                                                                                         |                   |
|-----------------------------------------------------------------------------------------------------------------------------------------------------------------------------------------------------------------------------------------------------------------------------------------------------------------------------------------------------------------------------------------------------------------------------------------|-------------------|
| and residual infliximab levels to monitor anti-TNF therapy." <u>Annals of the Rheumatic Disease</u> 71.                                                                                                                                                                                                                                                                                                                                 |                   |
| 65. Church, P., J. Guan, K. Frost, A. Muise, T. Walters and A. Griffiths (2013). "Infliximab treatment for paediatric Crohn's disease: Long-term outcomes at a single centre." <u>Journal of Crohn's and Colitis</u> 7: S198.                                                                                                                                                                                                           | Insufficient data |
| 66. Church, P., J. Guan, L. Salz, K. Frost, A. Muise, T. Walters and A. Griffiths (2012). "Long-term outcomes with infliximab treatment in children with Crohn's disease at a single centre." <u>Inflamm Bowel Dis</u> 18: S72-S77                                                                                                                                                                                                      | Insufficient data |
| 67. Cornillie, F., S. Hanauer, R. Diamond, J. Wang, D. Zelinger, Z. Xu, S. Vermeire and P. Rutgeerts (2011). "Early serum infliximab trough level, Clinical disease activity and crp as markers of sustained benefit of infliximab treatment in Crohn's disease: A post-HOC analysis of the accent 1 trial." <u>American Journal of Gastroenterology</u> 106: S462-S463                                                                 | Insufficient data |
| 68. Corstjens, P. L., K. Wiesmeijer, G. J. Wolbink, J. Tanke, D. W. Hommes and H. Fidder (2011). "A rapid test for quantitative determination of infliximab trough levels in blood." <u>Gastroenterology</u> 1): S276-S277                                                                                                                                                                                                              | Insufficient data |
| 69. Daperno M, Frigerio F, Guiotto C, et al. Evaluation of the diagnostic performance of two commercially available tests for infliximab trough levels (IFX-TL) and antibodies to infliximab (ATI) titration in inflammatory bowel disease (IBD). <u>Journal of Crohn's and Colitis</u> 2013;7:S213-4                                                                                                                                   | Insufficient data |
| 70. Daperno, M., A. Lavagna, M. Fracchia, C. Guiotto, L. Germano, C. Rigazio, E. Ercole, M. Migliardi, R. Pellerito and R. Rocca (2013). "Infliximab trough levels (IFX-TL) are higher in patients with inflammatory bowel disease (IBD) treated with immunosuppressives: Clinical correlations of IFX-TL and antibodies to infliximab (ATI) in IBD." <u>Gastroenterology</u> 1): S781                                                  | Insufficient data |
| 71. Daperno, M., A. Lavagna, M. Fracchia, C. Guiotto, L. Germano, C. Rigazio, E. Ercole, M. Migliardi, R. Pellerito and R. Rocca (2013). "Clinical correlations of infliximab trough levels (IFX-TL) and antibodies to infliximab (ATI) in inflammatory bowel disease." <u>Journal of Crohn's and Colitis</u> 7: S239.                                                                                                                  | Insufficient data |
| 72. Daperno, M., F. Frigerio, C. Guiotto, G. Laura, E. Ercole, A. Lavagna, C. Rigazio, S. Arico, M. Migliardi, R. Pellerito and R. Rocca (2013). "Comparison of the performance of two commercially available tests for determination of infliximab trough levels (IFX-TL) and antibodies to infliximab (ATI), promonitor and immunodiagnostik, in inflammatory bowel disease." <u>Digestive and Liver Disease</u> 45: S109.            | Insufficient data |
| 73. Daperno, M., F. Frigerio, C. Guiotto, L. Germano, E. Ercole, S. Arico, M. Fracchia, C. Rigazio, A. Lavagna, R. Pellerito, M. Migliardi and R. Rocca (2013). "Identical diagnostic performance of two commercially available tests for infliximab trough levels (IFX-TL) and antibodies to infliximab (ATI) titration in inflammatory bowel disease (IBD): Promonitor and immunodiagnostik tests." <u>Gastroenterology</u> 1): S780. | Duplicate         |
| 74. Daperno, M., M. Fracchia, C. Guiotto, L. Germano, E. Ercole, C. Rigazio, A. Lavagna, M. Migliardi, R. Pellerito and R. Rocca (2013). "Clinical implications and stability of determination of infliximab trough levels (IFX-TL) and antibodies to infliximab (ATI) in inflammatory bowel disease." <u>Digestive and Liver Disease</u> 45: S145.                                                                                     | Insufficient data |
| 75. De Bruyn, M., T. Bessissow, T. Billiet, I. Cleynen, R. Kirkland, X. Liu, S. Hauenstein, K. Drake, S. Singh, M. Ferrante, P. Rutgeerts, G. Van Assche, I. Arijs, G. Opdenakker and S. Vermeire (2014). "Biomarker panel for prediction of mucosal healing in patients with Crohn's disease under infliximab therapy." <u>Journal of Crohn's and Colitis</u> 8: S45-S46.                                                              | Insufficient data |
| 76. De Bruyn, M., T. Bessissow, T. Billiet, I. Cleynen, R. Kirkland, X. Liu, S. Hauenstein, K. Drake, S. Singh, M. Ferrante, P. J. Rutgeerts, G. A. Van Assche, I. Arijs, G. Opdenakker and S. Vermeire (2014).                                                                                                                                                                                                                         | Duplicate         |
| 77. Dotan, I., H. Yanai, Y. Ron, R. Kariv, S. Fishman, L. Yahav, M. Ben-Yehoyada, E. Santo and D. R. Mould (2014). "Population pharmacokinetic evaluation of adalimumab reveals patient factors that increase adalimumab clearance and shorten half-life in inflammatory bowel disease patients."                                                                                                                                       | Insufficient data |

|                                                                                                                                                                                                                                                                                                                                                                                                                       |                   |
|-----------------------------------------------------------------------------------------------------------------------------------------------------------------------------------------------------------------------------------------------------------------------------------------------------------------------------------------------------------------------------------------------------------------------|-------------------|
| Gastroenterology 1): S-243.                                                                                                                                                                                                                                                                                                                                                                                           |                   |
| 78. Dotan, I., Y. Ron, H. Yanai, S. A. Becker, S. Fishman, L. Yahav, M. B. Yehoyada and D. R. Mould (2013). "Population pharmacokinetic evaluation of infliximab reveals patient factors that increase infliximab clearance and shorten half-life in inflammatory bowel disease patients." <u>Gastroenterology</u> 1): S774.                                                                                          | Insufficient data |
| 79. Drastich, P., J. Kozeluhova, M. Jaresova and J. Spicak (2011). "Infliximab serum trough levels and deep remission in patients with IBD." <u>Gastroenterology</u> 1): S292                                                                                                                                                                                                                                         | Insufficient data |
| 80. Drobne, D., P. Bossuyt, C. Breynaert, N. Vande Castele, G. Compernelle, M. Juergens, V. Ballet, I. Cleynen, W. Wollants, A. Gils, P. Rutgeerts, S. Vermeire and G. Van Assche (2011). "Long term evolution and impact of immunomodulator co-treatment and withdrawal on infliximab trough levels in 223 patients with Crohn's disease." <u>Journal of Crohn's and Colitis</u> 5 (1): S10-S11.                     | Insufficient data |
| 81. Drobne, D., P. J. Bossuyt, C. Breynaert, N. V. Castele, G. Compernelle, M. Jurgens, V. Ballet, W. J. Wollants, I. Cleynen, P. J. Rutgeerts, S. Vermeire, A. Gils and G. A. Van Assche (2011). "Crohn's disease: Infliximab trough levels and CRP during infliximab-immunomodulator combination treatment are associated with clinical ouCTome after immunomodulator withdrawal." <u>Gastroenterology</u> 1): S62. | Insufficient data |
| 82. Duricova, D., K. Malickova, M. Bortlik, N. Machkova, V. Komarek, E. Bouzkova and M. Lukas (2011). "Predictors of sustained response to infliximab in patients with Crohn's disease: A single cohort study." <u>Gastroenterology</u> 1): S593.                                                                                                                                                                     | Insufficient data |
| 83. Echarri, A., P. Ferreira, R. Fraga-Iriso, M. Barreiro-De Acosta, J. Cid, L. De-Castro, S. Pereira, A. Fernandez-Villaverde, S. Soto, D. Carpio, B. Gonzalez, E. Castro, V. Ollero and A. C. Campos (2014). "Drug trough levels and primary nonresponse to antitnf therapy in moderate-severe crohn disease. Results of the optimiza study." <u>Gastroenterology</u> 1): S-247.                                    | Insufficient data |
| 84. Egea-Pujol L, Reddy R, Patel S, et al. Homogenous mobility shift assay (HMSA) overcomes the limitations of elisa and eclia assays for monitoring infliximab (IFX), adalimumab (ADA), and associated anti-drug antibodies in serum. <u>Am J Gastroenterol</u> 2013;108:S548 doi: <a href="http://dx.doi.org/10.1038/ajg.2013.269">http://dx.doi.org/10.1038/ajg.2013.269</a> [published Online First: Epub Date].  | Insufficient data |
| 85. Eser A, Primas C, Hauenstein S, et al. Comparison of early measurement of infliximab and antibodies-to-infliximab serum levels with standard trough analysis. <u>Gastroenterology</u> 2013;144(5 Suppl):S-779                                                                                                                                                                                                     | Insufficient data |
| 86. Eser A, Primas C, Haunstein S, et al. Detection of anti infliximab antibodies in patients with inflammatory bowel disease (IBD) in the presence of infliximab by homogeneous liquid phase anti infliximab mobility shift assay. <u>Journal of Crohn's and Colitis</u> 2013;7:S231-2                                                                                                                               | Insufficient data |
| 87. Eser, A., C. Primas, R. Shringarpure, S. Hauenstein, S. L. Wang and W. Reinisch (2012). "Detection of anti infliximab antibodies in patients with inflammatory bowel disease (IBD) in the presence of infliximab by homogeneous liquid phase anti infliximab mobility shift assay." <u>American Journal of Gastroenterology</u> 107: S657                                                                         | Duplicate         |
| 88. Fasanmade, A. A., C. Wagner, H. Davis, M. Graham, D. Everitt and A. Gottlieb (2002). "Comparison of the pharmacokinetics of infliximab in patients with psoriasis or Crohn's disease not receiving concomitant immunosuppressants or corticosteroids." <u>Journal of Investigative Dermatology</u> 119(1): 243-243.                                                                                               | Insufficient data |
| 89. Fasanmade, A. A., P. Marsters, E. Munsanje, M. A. Graham, H. M. Davis and S. Van Deventer (2003). "Infliximab pharmacokinetics and improvement in fistulizing Crohn's Disease." <u>Gastroenterology</u> 124(4): A61-A61.                                                                                                                                                                                          | Insufficient data |
| 90. Fasanmade, A. A., Y. W. Zhu, C. Wagner, C. Pendley and H. M. Davis (2002). "Population pharmacokinetics of single dose infliximab in patients with Crohn's disease." <u>Clinical Pharmacology &amp; Therapeutics</u> 71(2): P66-P66.                                                                                                                                                                              | Insufficient data |

|                                                                                                                                                                                                                                                                                                                                                    |                          |
|----------------------------------------------------------------------------------------------------------------------------------------------------------------------------------------------------------------------------------------------------------------------------------------------------------------------------------------------------|--------------------------|
| 91. Fasanmade, A., A. Olson, W. Bao, C. Pendley, H. Davis and L. Mayer (2002). "Relationship between infliximab pharmacokinetics and improvement in Crohns disease." <u>Gastroenterology</u> 122(4): A617-A618.                                                                                                                                    | Insufficient data        |
| 92. Feagan BG, Singh S, Lockton S, et al. Novel infliximab (IFX) and antibody-to-infliximab (ATI) assays are predictive of disease activity in patients with crohn's disease (CD). <u>Gastroenterology</u> 2012;142(5 Suppl):S-114                                                                                                                 | Insufficient data        |
| 93. Garces, S., J. Demengeot and E. Benito-Garcia (2012). "Clinical impact of immunogenicity of infliximab, adalimumab and etanercept: A systematic review of the literature with a meta-analysis." <u>Annals of the Rheumatic Disease</u> 71                                                                                                      | Superseded by full paper |
| 94. Garces, S., J. Demengeot, G. J. Wolbink, L. Aarden and E. Benito-Garcia (2011). "The immunogenicity of infliximab, adalimumab and etanercept in rheumatoid arthritis, ankylosing spondylitis, psoriatic arthritis, crohn's disease and ulcerative colitis a quantitative and a qualitative review." <u>Arthritis and Rheumatism</u> 1).        | Superseded by full paper |
| 95. Garces, S., J. Demengeot, J. C. Da Silva and L. Aarden (2011). "Bridging elisa as a screening assay to monitor immunogenicity in routine clinical practice." <u>Arthritis and Rheumatism</u> 1).                                                                                                                                               | <50% CD                  |
| 96. Garces, S., J. Demengeot, J. Canas-da-Silva and L. Aarden (2013). "Bridging ELISA as a screening assay to monitor immunogenicity in routine clinical practice." <u>Annals of the Rheumatic Disease</u> 71.                                                                                                                                     | Duplicate                |
| 97. Garces, S., J. Freitas, J. Canas-Silva, L. Aarden and J. Demengeot (2013). "The impact of immunogenicity on drug safety profile." <u>Annals of the Rheumatic Diseases</u> 72.                                                                                                                                                                  | Insufficient data        |
| 98. Garimella, T. S., J. Z. Peng, K. Beck, P. A. Noertersheuser, K. G. Lomax, S. K. Paulson and P. F. Pollack (2006). "Pharmacokinetics of adalimumab in a long-term investigation of the induction and maintenance of remission in patients with Crohn's disease (CLASSIC I and CLASSIC II)." <u>Gastroenterology</u> 130(4): A481-A481.          | Insufficient data        |
| 99. Goldberg R, Beswick L, Van Langenberg D, et al. Predictors of sub-therapeutic infliximab or adalimumab trough levels and anti-drug antibodies and their influence on therapeutic decisions. <u>Journal of Crohn's and Colitis</u> 2014;8:S223                                                                                                  | Insufficient data        |
| 100. Greathead L, Kelleher P, Steel A. Development and validation of ELISA to measure serum anti TNFa levels. <u>Journal of Crohn's and Colitis</u> 2014;8:S97-8                                                                                                                                                                                   | Insufficient data        |
| 101. Guan, J., L. Salz, K. Frost, A. Muise, T. Walters and A. Griffiths (2012). "Long-term outcomes with infliximab treatment in children with crohn's disease at a single centre peter church." <u>Inflamm Bowel Dis</u> 18: S5-S6.                                                                                                               | Duplicate                |
| 102. Guilday, C., D. Eastwood, Y. Zadvornova, D. Stein, A. S. Naik, K. Best, S. Skaros and L. P. Perera (2013). "Concomitant use of immunomodulator therapy results in higher serum infliximab levels compared to monotherapy without lowering serum haca levels." <u>Gastroenterology</u> 1): S429.                                               | Insufficient data        |
| 103. Guiotto, C., L. Germano, M. Vizzini, R. Cerruti, F. Frigerio, M. Daperno, R. Rocca and M. Migliardi (2013). "Determination of infliximab trough levels (IFX-TL) and antibodies to Infliximab (ATI) in inflammatory bowel disease." <u>Biochimica Clinica</u> 37: S475.                                                                        | Superseded               |
| 104. Hadigan, C. B. R., C. P. Braegger, E. Vasilauskis, J. C. Escher, M. Sinaasappel, G. D. Ferry, B. Kirschner, C. Wagner, R. Livingston, K. DeWoody and H. S. Winter (1999) Pharmacokinetics of infliximab (Anti-TNFx) in children with Crohn's disease: A multicenter trial. <u>Journal of Pediatric Gastroenterology and Nutrition</u> 29, 525 | Insufficient data        |
| 105. Hauenstein S, Ohrmund L, Salbato J, et al. Comparison of homogeneous mobility shift assay and solid phase elisa for the measurement of drug and anti-drug antibody (ADA) levels in serum from patients treated with anti-TNF biologics. <u>Gastroenterology</u> 2012;142(5 Suppl):S-538                                                       | Insufficient data        |
| 106. Hauenstein, S., J. Salbato, S. Lockton and S. Singh (2013). "Characterization of neutralizing anti-drug antibody response in patients with loss of response to anti-TNF therapy." <u>Gastroenterology</u> 1): S418                                                                                                                            | Insufficient data        |

|                                                                                                                                                                                                                                                                                                                                                                                                                              |                         |
|------------------------------------------------------------------------------------------------------------------------------------------------------------------------------------------------------------------------------------------------------------------------------------------------------------------------------------------------------------------------------------------------------------------------------|-------------------------|
| 107.Hayes and Inc (2013) Use of anti-infliximab antibody levels to monitor infliximab treatment in patients with inflammatory bowel disease (IBD) (Structured abstract). <a href="#">Health Technology Assessment Database</a>                                                                                                                                                                                               | Not available           |
| 108.Hester, K. D., X. Liu, J. Salbato, S. Lockton, S. Hauenstein and S. Singh (2014). "Improved homogeneous mobility shift assay (HMSA) for the detection of neutralizing antibodies (NAB) in ibd patients treated with infliximab or adalimumab." <a href="#">Gastroenterology 1</a> ): S-248                                                                                                                               | Insufficient data       |
| 109.Hibi, T., A. Sakuraba, M. Watanabe, S. Motoya, H. Ito, N. Sato, T. Yoshinari, K. Motegi, K. Yoshitaka, M. Takazoe, Y. Suzuki, T. Matsumoto, K. Kawakami, I. Hirata, S. Tanaka, T. Ashida and T. Matsui (2012). "Decrease in serum infliximab level precedes loss of clinical response and can be easily detected by the elevation of C-reactive protein in crohn's disease." <a href="#">Gastroenterology 1</a> ): S388. | Insufficient data       |
| 110.Hoekman, D. R., J. F. Brandse, T. De Meij, T. Hummel, M. Lowenberg, M. A. Benninga, G. R. D'Haens and A. Kindermann (2014). "Large variation in infliximab trough levels is associated with disease activity in paediatric inflammatory bowel disease." <a href="#">Gastroenterology 1</a> ): S-782.                                                                                                                     | Insufficient data       |
| 111.Hoekman, D., H. Brandse, T. De Meij, T. Hummel, M. Lowenberg, M. Benninga, G. D'Haens and A. Kindermann (2014). "Large variation in infliximab trough levels is associated with disease activity in paediatric inflammatory bowel disease." <a href="#">Journal of Crohn's and Colitis 8</a> : S35.                                                                                                                      | Insufficient data       |
| 112.Huang, V. W., C. Prosser, C. Shalapay, D. K. Fedorak, N. Dhama, H. Wang, K. I. Kroeker and R. N. Fedorak (2014). "In IBD outpatients knowledge of fecal calprotectin and infliximab trough levels significantly enhances infliximab dose escalation decision making." <a href="#">Journal of Crohn's and Colitis 8</a> : S255.                                                                                           | Insufficient data       |
| 113.Huang, V. W., N. Dhama, D. K. Fedorak, C. Prosser, C. Shalapay, K. I. Kroeker and R. N. Fedorak (2014). "Disparity between infliximab trough level and infliximab associated adverse events." <a href="#">Journal of Crohn's and Colitis 8</a> : S282                                                                                                                                                                    | Insufficient data       |
| 114.Huang, V., K. I. Kroeker, H. Wang, C. Prosser, S. Carol, N. Dhama, D. K. Fedorak and R. N. Fedorak (2014). "In IBD outpatients knowledge of fecal calprotectin and infliximab trough levels significantly alters clinical decision making." <a href="#">Gastroenterology 1</a> ): S241-S242.                                                                                                                             | Duplicate               |
| 115.Huang, V., N. Dhama, D. K. Fedorak, C. Prosser, S. Carol, K. I. Kroeker and R. N. Fedorak (2014). "Infliximab trough levels are correlated with infliximab-associated adverse events." <a href="#">Gastroenterology 1</a> ): S-1.                                                                                                                                                                                        | Insufficient data       |
| 116.Imaeda, H., A. Andoh, H. Ban, S. Bamba, M. Sasaki, T. Tsujikawa and Y. Fujiyama (2012). "The new immunoassay for the accurate determination of antibodies to infliximab, and relationship between its serum level and inflammatory values in crohn's disease." <a href="#">Gastroenterology 1</a> ): S349.                                                                                                               | Superseded by full text |
| 117.Imaeda, H., A. Andoh, K. Takahashi, T. Fujimoto, H. Ban, S. Bamba and Y. Fujiyama (2012). "Serum infliximab trough levels above 1.0 mg/ml are required to obtain clinical efficacy in patients with crohn's disease." <a href="#">Inflamm Bowel Dis 18</a> : S59-S60.                                                                                                                                                    | Insufficient data       |
| 118.Imaeda, H., A. Andoh, S. Bamba, T. Tsujikawa and Y. Fujiyama (2011). "Development of a new Immunoassay for the accurate determination of anti-infliximab antibodies in Crohn's Disease." <a href="#">Inflamm Bowel Dis 17</a> : S42.                                                                                                                                                                                     | Duplicate               |
| 119.Imaeda, H., K. Takahashi, T. Fujimoto, S. Bamba, M. Sasaki, T. Tsujikawa, Y. Fujiyama and A. Andoh (2013). "Accurate determination of serum adalimumab and anti-adalimumab antibodies levels during maintenance therapy for crohn's disease." <a href="#">Gastroenterology 1</a> ): S431.                                                                                                                                | Insufficient data       |
| 120.Irving, P. M., Z. Arkir, J. Duncan, M. Sastrillo, S. Anderson and J. Sanderson (2012). "Initial experience with infliximab levels in a tertiary IBD centre." <a href="#">Gut 61</a> : A238.                                                                                                                                                                                                                              | Insufficient data       |
| 121.Jauregui-Amezaga, A., I. Ordas, M. Gallego, A. Ramirez, S. Pino, M. C. Masamunt, M. Juan, E. Ricart, J. Yague and J. Panes (2013). "Impact of serum drug level and human anti-drug antibody measurement on management of biologic drugs in inflammatory bowel disease." <a href="#">Journal of</a>                                                                                                                       | Insufficient data       |

|                                                                                                                                                                                                                                                                                                                                                                                                           |                   |
|-----------------------------------------------------------------------------------------------------------------------------------------------------------------------------------------------------------------------------------------------------------------------------------------------------------------------------------------------------------------------------------------------------------|-------------------|
| <u>Crohn's and Colitis 7: S202-S203.</u>                                                                                                                                                                                                                                                                                                                                                                  |                   |
| 122. Juan, G., A. Alvarino, L. Oltra, N. Maroto, N. Cano, I. Ferrer and J. Hinojosa (2014). "Utility of "trough levels" determination and anti-infliximab antibodies in patients with inflammatory bowel disease. Estimation of individual pharmacokinetic parameters (PK) through population pharmacokinetic model." <u>Journal of Crohn's and Colitis 8: S190</u>                                       | Insufficient data |
| 123. Karmiris, K., G. Paintaud, D. Degenne, M. Ferrante, A. C. Duveau, M. Noman, G. A. Van Assche, S. Vermeire and P. Rutgeerts (2008). "Adalimumab trough serum levels and clinical response in a single-center cohort of inflammatory bowel disease patients: Can trough serum levels serve as a predictor for future loss of response?" <u>Gastroenterology 134(4): A68-A68.</u>                       | Insufficient data |
| 124. Karmiris, K., M. Noman, G. Paintaud, M. Ferrante, A. C. Duveau, D. Degenne, G. A. Van Assche, S. Vermeire and P. Rutgeerts (2008). "A 3-week course of 80 mg weekly administered adalimumab as a rescue therapy for patients with Crohn's disease who lost response to 40 mg weekly: Relationship with adalimumab trough serum levels." <u>Gastroenterology 134(4): A640-A640.</u>                   | Insufficient data |
| 125. Karsan, S. S., E. R. Cohen, S. R. Targan, A. Ippoliti, D. Q. Shih, E. A. Vasiliauskas, M. Dubinsky, D. Berel and D. P. McGovern (2012). "Analysis of clinical and serological associations, and the clinical consequences of the development of human anti-chimeric antibodies (HACAS), and low serum infliximab (IFX) levels in inflammatory bowel disease (IBD)." <u>Gastroenterology 1): S264</u> | Insufficient data |
| 126. Kerr, J., A. Nair and R. Hinds (2013). "Variable practice in children with inflammatory bowel disease requiring infliximab infusions across Australia." <u>Journal of Gastroenterology and Hepatology 28: 141.</u>                                                                                                                                                                                   | Insufficient data |
| 127. Kong, J. Y., C. Bundell, J. Pawlik, P. Hollingsworth and G. Forbes (2013). "Low Trough serum infliximab and antibodies to infliximab in smokers." <u>Inflamm Bowel Dis 19(3): E35-E36.</u>                                                                                                                                                                                                           | Insufficient data |
| 128. Kong, J. Y., C. S. Bundell, J. Pawlik, P. N. Hollingsworth and G. M. Forbes (2011). "Smoking is associated with low trough serum infliximab levels and presence of anti-infliximab antibody in maintenance treatment of inflammatory bowel disease (IBD)." <u>Journal of Gastroenterology and Hepatology 26: 59</u>                                                                                  | Insufficient data |
| 129. Lamblin, C., A. Aubourg, D. Ternant, L. Picon, T. Lecomte and G. Paintaud (2012). "Concentration effect relationship of infliximab in Crohn's disease: Results of a cohort study." <u>Journal of Crohn's and Colitis 6: S142-S143.</u>                                                                                                                                                               | Insufficient data |
| 130. Leclerc, M., H. Marotte, S. Paul, E. Del Tedesco, P. Gonzalo, J. M. Phelip, L. Peyrin Biroulet and X. Roblin (2014). "Persistence of antibodies to infliximab for more than two months strongly predicts loss of response to infliximab in inflammatory bowel diseases." <u>Journal of Crohn's and Colitis 8: S226-S227.</u>                                                                         | Insufficient data |
| 131. Li, J. L., S. K. Paulson, Y. L. Chiu, A. Robinson, K. G. Lomax and P. F. Pollack (2010). "Evaluation of potential correlations between serum adalimumab concentration and remission in patients with Crohn's disease in classic I and II." <u>Gastroenterology 1): S101.</u>                                                                                                                         | Insufficient data |
| 132. Lowenberg, M., J. Brandse, L. Vos, C. Ponsioen, G. Van Den Brink and G. D'Haens (2014). "High infliximab trough levels are associated with impaired quality of life in IBD patients in clinical and biochemical remission on maintenance IFX therapy." <u>Journal of Crohn's and Colitis 8: S262-S263</u>                                                                                            | Insufficient data |
| 133. Lowenberg, M., J. F. Brandse, L. M. Vos, C. Ponsioen, G. R. Van Den Brink and G. R. D'Haens (2014). "High infliximab trough levels are associated with impaired quality of life in IBD patients in clinical and biochemical remission on maintenance IFX therapy." <u>Gastroenterology 1):</u>                                                                                                       | Insufficient data |

|                                                                                                                                                                                                                                                                                                                                                                                      |                         |
|--------------------------------------------------------------------------------------------------------------------------------------------------------------------------------------------------------------------------------------------------------------------------------------------------------------------------------------------------------------------------------------|-------------------------|
| S-450.                                                                                                                                                                                                                                                                                                                                                                               |                         |
| 134.Lukas, M., K. Malickova, M. Bortlik and D. Duricova (2009). "Anti-infliximab antibodies in routine clinical practice - Is it worth to assess them?" <u>Gastroenterology</u> 1): A679.                                                                                                                                                                                            | Insufficient data       |
| 135.Malickova, K., I. Janatkova, D. Duricova, M. Bortlik and M. Lukas (2011). "Serum infliximab levels, antibodies to infliximab and albumin concentrations during infliximab treatment in patients with inflammatory bowel disease." <u>Clinical and Experimental Rheumatology</u> 29(1): 213-213.                                                                                  | Insufficient data       |
| 136.Martin Arranz, M. D., E. Martin Arranz, D. Pascual-Salcedo, C. De Diego, M. Jaquotot, S. Gomez Senent, J. Poza and J. M. Suarez Parga (2014). "Infliximab trough levels and antibodies: Relationship with infusion reaction, immunomodulators and biological parameters." <u>Journal of Crohn's and Colitis</u> 8: S251                                                          | Insufficient data       |
| 137.Mazor Y, Kopylov U, Hur DB, et al. Evaluating adalimumab drug and antibody levels as predictors of clinical and laboratory response in crohn's disease patients. <u>Gastroenterology</u> 2013;144(5 Suppl):S-778                                                                                                                                                                 | Insufficient data       |
| 138.Mazor, Y., U. Kopylov, D. Ben Hur, R. Almog, M. Waterman, S. Ben-Horin and Y. Chowers (2013). "Evaluating Adalimumab drug and antibody levels as predictors of clinical and laboratory response in Crohn's disease patients." <u>Journal of Crohn's and Colitis</u> 7: S217.                                                                                                     | Insufficient data       |
| 139.McTigue M, Sandborn W, Levesque B, et al. Clinical utility of next generation infliximab and antibodies to infliximab assay. <u>Am J Gastroenterol</u> 2013;108:S527 doi: <a href="http://dx.doi.org/10.1038/ajg.2013.269">http://dx.doi.org/10.1038/ajg.2013.269</a> [published Online First: Epub Date].                                                                       | Insufficient data       |
| 140.McTigue, M., W. Sandborn, B. Levesque and D. Patel (2013). "Infliximab therapeutic drug monitoring in clinical practice: Indications and utility." <u>American Journal of Gastroenterology</u> 108: S512.                                                                                                                                                                        | Insufficient data       |
| 141.Morgenstern, J., E. Baestlein, L. Leifeld, P. Nguyen, J. Stein and W. Kruis (2012). "Infliximab drug levels in Crohn's disease responding to the treatment." <u>Journal of Crohn's and Colitis</u> 6: S125                                                                                                                                                                       | Insufficient data       |
| 142.Noman, M., F. Baert, S. Vermeire, G. Van Assche, G. D'Haens, A. Carbonez and P. Rutgeerts (2002). "Post infusion infliximab levels determine duration of response in Crohn's disease and are directly related to infusion reactions." <u>Gastroenterology</u> 122(4): A100-A100.                                                                                                 | Insufficient data       |
| 143.O'Donnell, S., J. M. Stempak and M. S. Silverberg (2014). "Is there a higher rate of infliximab dose optimization in initial responders between UC and CD cases?" <u>Gastroenterology</u> 1): S462-S463.                                                                                                                                                                         | Insufficient data       |
| 144.Papamichail, K., N. V. Castele, S. Hauenstein, F. Princen, S. Singh, M. Ferrante, G. A. Van Assche, P. J. Rutgeerts, A. Gils and S. Vermeire (2014). "Prediction of sustained remission after discontinuation of infliximab in patients with crohn's disease." <u>Gastroenterology</u> 1): S-457.                                                                                | Insufficient data       |
| 145.Pariante, B., G. P. De Chambrun, M. Desroches, C. De Cassan, J. M. Gornet, P. Desreumaux, R. Krzysiek, D. Emilie, J. F. Colombel and M. Allez (2011). "Clinical value of measuring trough levels and human anti-chimeric antibodies in patients with inflammatory bowel disease who lost response to infliximab therapy." <u>Gastroenterology</u> 1): S277.                      | Superseded by full text |
| 146.Pariante, B., G. Pineton De Chambrun, M. Desroches, C. De Cassan, J. Gornet, P. Desreumaux, R. Krzysiek, D. Emilie, J. Colombel and M. Allez (2011). "Clinical value of measuring trough levels and human anti-chimeric antibodies in patients with inflammatory bowel disease who lost response to infliximab therapy." <u>Journal of Crohn's and Colitis</u> 5 (1): S111-S112. | Duplicate               |
| 147.Paul S, Tedesco ED, Marotte H, et al. Interest of the dosage of serum concentration of infliximab and antibodies anti infliximab in the therapeutic response under infliximab in IBD. <u>Gastroenterology</u> 2012;142(5 Suppl):S354                                                                                                                                             | Insufficient data       |

|                                                                                                                                                                                                                                                                                                                                                |                         |
|------------------------------------------------------------------------------------------------------------------------------------------------------------------------------------------------------------------------------------------------------------------------------------------------------------------------------------------------|-------------------------|
| 148. Paul, S., E. Del Tedesco, H. Marotte, L. Clavel, J. M. Phelip, L. Peyrin-Biroulet and X. Roblin (2013). "Therapeutic drug monitoring of infliximab and mucosal healing in inflammatory bowel disease: A prospective study." <u>Gastroenterology</u> 1): S92.                                                                              | Superseded by full text |
| 149. Paul, S., E. Del Tedesco, H. Marotte, M. Rinaudo-Gaujous, J. M. Phelip, L. Peyrin-Biroulet and X. Roblin (2013). "Infliximab concentration is associated with mucosal healing in intestinal bowel disease (IBD)." <u>Journal of Crohn's and Colitis</u> 7: S199-S200.                                                                     | Insufficient data       |
| 150. Paulson, S. K., P. Noctersheuser, P. F. Pollack and R. S. Hoffman (2005). "Pharmacokinetics of adalimumab from classic, a randomized phase 3 trial for the induction of clinical remission in patients with Crohn's." <u>Gastroenterology</u> 128(4): A585-A585.                                                                          | Insufficient data       |
| 151. Pradhan, R. S., S. Sharma, R. Thakkar, A. Robinson, J. S. Hyams, J. R. Rosh, F. Ruemmele and W. M. Awni (2013). "Relationship between adalimumab concentration and efficacy for the induction of clinical remission in pediatric patients with moderate to severe crohn's disease." <u>Gastroenterology</u> 1): S230-S231.                | Duplicate               |
| 152. Pradhan, R., S. Sharma, R. Thakkar, A. Robinson, J. Hyams, J. Rosh, F. M. Ruemmele and W. Awni (2013). "Relationship between adalimumab concentration and efficacy for the induction of clinical remission in pediatric patients with moderate to severe Crohn's disease." <u>Journal of Crohn's and Colitis</u> 7: S164.                 | Insufficient data       |
| 153. Rai, T., U. Navaneethan, D. Dalal, B. Lashner and B. Shen (2012). "Clinical implications of measuring infliximab levels and human anti-chimeric antibodies in patients with inflammatory bowel disease." <u>American Journal of Gastroenterology</u> 107: S634.                                                                           | Insufficient data       |
| 154. Rekvig, M., M. Gedde Dahl, J. Bratlie, N. Bolstad, B. Moum, J. Jahnsen and K. E. A. Lundin (2014). "Anti-TNFalpha drug level measurements in IBD patients." <u>Journal of Crohn's and Colitis</u> 8: S301-S302.                                                                                                                           | Insufficient data       |
| 155. Roblin, X., H. Marotte, E. Del Tedesco, M. Rinaudo-gaujous, J. M. Phelip and S. Paul (2013). "Residual adalimumab trough levels are associated with clinical remission and mucosal healing in IBD." <u>Gastroenterology</u> 1): S778.                                                                                                     | Insufficient data       |
| 156. Roblin, X., M. Rinaudo, E. Del Tedesco, J. M. Phelip, L. Peyrin Biroulet and S. Paul (2014). "Development of an algorithm incorporating pharmacokinetics of adalimumab in inflammatory bowel diseases." <u>Journal of Crohn's and Colitis</u> 8: S41.                                                                                     | Insufficient data       |
| 157. Roblin, X., M. Rinaudo-gaujous, E. Del Tedesco, J. M. Phelip, C. Genin, L. Peyrin-Biroulet and S. Paul (2014). "Development of an algorithm incorporating pharmacokinetics of adalimumab in inflammatory bowel diseases." <u>Gastroenterology</u> 1): S-150.                                                                              | Duplicate               |
| 158. Rosenthal, C., G. Melmed, B. Tripuraneni, J. Gebbia, S. Callejas, S. Farrior, S. Rabizadeh and M. Dubinsky (2012). "Early infliximab trough levels predict remission at one year in pediatric IBD patients." <u>Inflamm Bowel Dis</u> 18: S81.                                                                                            | Insufficient data       |
| 159. Rubin, D., S. Hauenstein and S. Singh (2013). "Post-marketing review of serum adalimumab and antibodies to adalimumab using the mobility shift assay platform." <u>American Journal of Gastroenterology</u> 108: S532.                                                                                                                    | Insufficient data       |
| 160. Scaldaferri, F., S. Pecere, V. Petito, G. Cammarota, M. C. Campanale, G. L. Rapaccini, A. Armuzzi, L. Guidi, A. Poscia, A. Amato, A. Sgambato, A. Gasbarrini and A. Papa (2012). "Infliximab and TNF ALFA measurement in intestinal mucosa of IBD patients: A new tool for the clinic?" <u>Digestive and Liver Disease</u> 44: S189-S190. | Insufficient data       |
| 161. Schatz, S. B., C. Prell, F. Freudenberg, T. Schwerd, P. Bufler and S. Koletzko (2011). "Correlation of infliximab levels and antibodies with clinical outcome in children with IBD." <u>Journal of Pediatric Gastroenterology and Nutrition</u> 52: E45.                                                                                  | Insufficient data       |



|                                                                                                                                                                                                                                                                                                                                                                                                                                                                                                 |                          |
|-------------------------------------------------------------------------------------------------------------------------------------------------------------------------------------------------------------------------------------------------------------------------------------------------------------------------------------------------------------------------------------------------------------------------------------------------------------------------------------------------|--------------------------|
| 162.Semmler J, Pilch A, Armbruster F, et al. Development of a new immunoassay for the accurate determination of anti-infliximab antibodies in inflammatory bowel disease. Clin Chem Lab Med 2013;51 (10):eA27-8 doi: http://dx.doi.org/10.1515/cclm-2013-0737[published Online First: Epub Date]].                                                                                                                                                                                              | Insufficient data        |
| 163.Semmler, J. M., A. Pilch, F. P. Armbruster, A. Dignass, W. Kruis and J. Stein (2014). "Development of a new immunoassay for the accurate determination of anti-infliximab antibodies in inflammatory bowel disease." <u>Journal of Crohn's and Colitis</u> 8: S41.                                                                                                                                                                                                                          | Duplicate                |
| 164.Semmler, J., A. Pilch, F. P. Armbruster, A. Dignass and J. Stein (2014). "Development of a new immunoassay for the accurate determination of anti-infliximab antibodies in inflammatory bowel disease." <u>Clinical Chemistry and Laboratory Medicine</u> 52: S1008.                                                                                                                                                                                                                        | Duplicate                |
| 165.Settesoldi, A., M. Giannotta, M. Milla, S. Genise, A. Santini, S. Bagnoli, V. Annese, A. Matucci, A. Vultaggio, G. Petroni, S. Pratesi, F. Nencini and E. Maggi (2012). "Loss of efficacy and adverse drug reactions during infliximab therapy in IBD patients are related to the appearance of anti-infliximab antibodies." <u>Journal of Crohn's and Colitis</u> 6: S151.                                                                                                                 | Duplicate                |
| 166.Settesoldi, A., M. Giannotta, S. Genise, A. Santini, S. Bagnoli, M. Milla, V. Annese, A. Matucci, A. Vultaggio, G. Petroni, S. Pratesi, F. Nencini and E. Maggi (2012). "Loss of efficacy and adverse drug reactions during infliximab therapy in IBD patients are related to the appearance of anti-infliximab antibodies." <u>Digestive and Liver Disease</u> 44: S194.                                                                                                                   | Insufficient data        |
| 167.Sharma, S., R. Pradhan, R. Thakkar, A. Robinson, J. Hyams, J. Rosh, F. M. Ruemmele and W. Awni (2013). "Relationship between adalimumab concentration and efficacy for the maintenance of clinical remission in pediatric patients with moderate to severe Crohn's disease." <u>Journal of Crohn's and Colitis</u> 7: S163.                                                                                                                                                                 | Insufficient data        |
| 168.Sharma, S., R. S. Pradhan, R. Thakkar, A. Robinson, J. S. Hyams, J. R. Rosh, F. Ruemmele and W. M. Awni (2013). "Relationship between adalimumab concentration and efficacy for the maintenance of clinical remission in pediatric patients with moderate to severe crohn's disease." <u>Gastroenterology</u> 1): S231.                                                                                                                                                                     | Insufficient data        |
| 169.Sorrentino, D., S. Hauenstein, M. Marino, S. Lockton, D. Zarifi, T. Del Bianco and S. Singh (2013). "Low dose infliximab for prevention of postoperative recurrence of crohn's disease: Long term follow-up and impact of infliximab trough levels and antibodies to infliximab." <u>Gastroenterology</u> 1): S777                                                                                                                                                                          | Insufficient data        |
| 170.Steenholdt, C., J. Brynskov, O. Thomsen, L. K. Munck, J. Fallingborg, L. A. Christensen, G. Pedersen, J. Kjeldsen, K. Bendtzen and M. A. Ainsworth (2013). "Secondary infliximab treatment failure in crohn's disease: Therapeutic implications of measuring drug and anti-drug antibodies by three different binding assays." <u>Gastroenterology</u> 1): S773                                                                                                                             | Duplicate                |
| 171.Steenholdt, C., J. Brynskov, O. Thomsen, L. K. Munck, J. Fallingborg, L. A. Christensen, G. Pedersen, J. Kjeldsen, B. A. Jacobsen, A. S. Oxholm, J. Kjellberg, K. Bendtzen and M. A. Ainsworth (2013). "Treatment of secondary infliximab failure in crohn's disease based on serum levels of infliximab and antibodies against infliximab: The danish study of optimizing infliximab therapy in crohn's disease (do it crohn) randomized clinical trial." <u>Gastroenterology</u> 1): S22. | Superseded by full paper |
| 172.Steenholdt, C., J. Brynskov, O. Thomsen, L. K. Munck, J. Fallingborg, L. A. Christensen, G. Pedersen, J. Kjeldsen, K. Bendtzen and M. A. Ainsworth (2013). "Secondary infliximab treatment failure in crohn's disease: Therapeutic implications of measuring drug and anti-drug antibodies by three different binding assays." <u>Gastroenterology</u> 1): S773.                                                                                                                            | Duplicate                |
| 173.Steenholdt, C., J. Brynskov, O. Thomsen, L. Munck, J. Fallingborg, L. Christensen, G. Pedersen, J. Kjeldsen, K. Bendtzen and M. Ainsworth (2013). "Secondary infliximab treatment failure in Crohn's disease:                                                                                                                                                                                                                                                                               | Superseded by full       |

|                                                                                                                                                                                                                                                                                                                                                                                                                                |                         |
|--------------------------------------------------------------------------------------------------------------------------------------------------------------------------------------------------------------------------------------------------------------------------------------------------------------------------------------------------------------------------------------------------------------------------------|-------------------------|
| Therapeutic implications of measuring drug and anti-drug antibodies by three different binding assays." <u>Journal of Crohn's and Colitis</u> 7: S159.                                                                                                                                                                                                                                                                         | text                    |
| 174.Steenholdt, C., J. Brynskov, O. Thomsen, L. Munck, J. Fallingborg, L. Christensen, G. Pedersen, J. Kjeldsen, K. Bendtzen, S. Lockton, S. Hauenstein, R. Shringarpure, E. Chuang, S. Singh and M. Ainsworth (2012). "Comparison of techniques for monitoring infliximab and antibodies to infliximab in Crohn's disease patients with infliximab treatment failure." <u>American Journal of Gastroenterology</u> 107: S622. | Superseded by full text |
| 175.Steenholdt, C., K. Bendtzen, J. Brynskov, O. O. Thomsen and M. A. Ainsworth (2014). "Clinical implications of measuring drug and anti-drug antibodies by different assays when optimizing infliximab treatment failure in Crohn's disease." <u>Journal of Crohn's and Colitis</u> 8: S291.                                                                                                                                 | Duplicate               |
| 176.Steenholdt, C., K. Bendtzen, J. Brynskov, O. Thomsen and M. A. Ainsworth (2014). "Clinical implications of measuring drug and anti-drug antibodies by different assays when optimizing infliximab treatment failure in crohn's disease." <u>Gastroenterology</u> 1): S-240.                                                                                                                                                | Superseded by full text |
| 177.Steenholdt, C., K. Bendtzen, O. O. Thomsen, J. Brynskov and M. Ainsworth (2010). "Discriminating between response types in infliximab-treated patients with Crohn's disease: Sensitivity and specificity of combined assessment of infliximab trough levels and antidrug antibodies." <u>Scandinavian Journal of Gastroenterology</u> 45: 59-59.                                                                           | Superseded by full text |
| 178.Steenholdt, C., M. Svenson, K. Bendtzen, O. Thomsen, J. Brynskov and M. A. Ainsworth (2011). "Can measurements of anti-infliximab antibodies predict acute severe infusion reactions to inflixims241ab?" <u>Gastroenterology</u> 1): S774                                                                                                                                                                                  | Insufficient data       |
| 179.Steenholdt, C., M. Svenson, M. A. Ainsworth, O. Thomsen, J. Brynskov and K. Bendtzen (2012). "Comparison of techniques for monitoring infliximab bioavailability and immunogenicity in crohn's disease." <u>Gastroenterology</u> 1): S781                                                                                                                                                                                  | Insufficient data       |
| 180.Steenholdt, C., O. O. Thomsen, J. Brynskov, K. Bendtzen and M. A. Ainsworth (2010). "Discriminating between response types in infliximab-treated patients with Crohn's disease: Sensitivity and specificity of combined assessment of infliximab trough levels and anti-drug antibodies." <u>Gastroenterology</u> 1): S687-S688.                                                                                           | Insufficient data       |
| 181.Steenholdt, C., Y. Palarasah, K. Bendtzen, A. Teisner, B. Teisner, J. Brynskov and C. Nielsen (2013). "Pre-existing IgG antibodies to the Fab region of infliximab predict efficacy and safety in IBD patients naive to anti-TNF agents." <u>Journal of Crohn's and Colitis</u> 7: S6.                                                                                                                                     | Insufficient data       |
| 182.Steenholdt, C., Y. Palarasah, K. Bendtzen, A. Teisner, J. Brynskov, B. Teisner and C. H. Nielsen (2013). "Pre-existing IGG antibodies to the fab region of infliximab predict efficacy and safety in ibd patients naive to anti-TNF agents." <u>Scandinavian Journal of Immunology</u> 77 (4): 333.                                                                                                                        | Insufficient data       |
| 183.Szepes, Z., E. Kunstar, K. Farkas, F. Nagy, R. Gyulai, R. Kui, A. Kinyo, A. Balint, M. Szucs, T. Wittmann and T. Molnar (2013). "Clinical utility of measuring serum TNF alpha level, anti TNF alpha levels and antibody titers in critical situations in inflammatory bowel disease and in psoriasis." <u>Journal of Crohn's and Colitis</u> 7: S118-S119.                                                                | Insufficient data       |
| 184.Tang, J., X. Gao, M. Zhi, H. Zhou, H. Chen, M. Zhang, Q. Yang and Z. Liang (2014). "Serum infliximab levels and early mucosal healing in Crohn's disease." <u>Journal of Crohn's and Colitis</u> 8: S209-S210.                                                                                                                                                                                                             | Insufficient data       |
| 185.Turon, J., A. Langseder, R. Irizarry, K. Ahuja and J. R. Rosh (2013). "Clinical outcome of pediatric IBD patients after measurement of infliximab drug and anti-drug antibody levels." <u>Gastroenterology</u> 1): S531.                                                                                                                                                                                                   | Insufficient data       |
| 186.Ungar B, Anafy A, Kopylov U, et al. The clinical and immunological significance of low level of infliximab in the absence of anti-infliximab antibodies in patients with IBD. <u>Gastroenterology</u> 2014;146(5 Suppl):S-245 doi: <a href="http://dx.doi.org/10.1016/S0016-5085%2814%2960862-3">http://dx.doi.org/10.1016/S0016-5085%2814%2960862-3</a> published                                                         | Insufficient data       |

|                                                                                                                                                                                                                                                                                                                                                                                                                             |                         |
|-----------------------------------------------------------------------------------------------------------------------------------------------------------------------------------------------------------------------------------------------------------------------------------------------------------------------------------------------------------------------------------------------------------------------------|-------------------------|
| Online First: Epub Date]].                                                                                                                                                                                                                                                                                                                                                                                                  |                         |
| 187. Ungar, B., A. Anafy, M. Yavzori, O. Picard, E. Fudim, U. Kopylov, Y. Ron, H. Yanai, I. Dotan, Y. Chowers, R. Eliakim and S. Ben-Horin (2014). "The clinical and immunological significance of low level of infliximab in the absence of anti-infliximab antibodies in patients with IBD." <u>Journal of Crohn's and Colitis</u> 8: S113.                                                                               | Duplicate               |
| 188. Ungar, B., U. Kopylov, M. Yavzori, E. Fudim, O. Picard, A. Lahat, B. Avidan, A. Lang, B. Weiss, Y. Chowers, R. Eliakim and S. Ben-Horin (2014). "Predictors of formation of antibodies to infliximab (ATI) and secondary loss of response in IBD patients treated with infliximab." <u>Journal of Crohn's and Colitis</u> 8: S45.                                                                                      | Insufficient data       |
| 189. Ussia, V., L. Ceccarelli, S. Maltinti, G. Di Fluri, M. G. Mumolo, V. Bolognesi, A. Ricchiuti, M. Bellini, S. Marchi and F. Costa (2014). "A prospective assessment of antidrug antibody response over time by a new ELISA in patients with IBD treated with infliximab." <u>Journal of Crohn's and Colitis</u> 8: S298-S299.                                                                                           | Insufficient data       |
| 190. Van Der Woude, C. J., E. Bultman, J. Deuring, R. West, Z. Zelinkova and M. Peppelenbosch (2013). "Adalimumab trough levels in a prospective cohort of Crohn's disease patients." <u>Journal of Crohn's and Colitis</u> 7: S250.                                                                                                                                                                                        | Insufficient data       |
| 191. Van Der Woude, C. J., J. J. Deuring, R. West, Z. Zelinkova and M. P. Peppelenbosch (2013). "Adalimumab trough levels in a prospective cohort of crohn's disease patients." <u>Gastroenterology</u> 1): S567.                                                                                                                                                                                                           | Duplicate               |
| 192. Van Moerkercke, W., C. Ackaert, G. Compernelle, M. Jurgens, I. Cleynen, G. A. Van Assche, P. J. Rutgeerts, A. Gils and S. Vermeire (2010). "High infliximab trough levels are associated with mucosal healing in Crohn's disease." <u>Gastroenterology</u> 1): S60.                                                                                                                                                    | Insufficient data       |
| 193. Van Moerkercke, W., G. Compernelle, C. Ackaert, A. Gils, S. Vermeire, M. Jurgens, I. Cleynen, G. Van Assche and P. Rutgeerts (2010). "Mucosal healing in Crohn's disease is associated with high infliximab trough levels." <u>Journal of Crohn's and Colitis Supplements</u> 4 (1): 30-31.                                                                                                                            | Insufficient data       |
| 194. Vande Castele N, Peeters M, Compernelle G, et al. TNF-responsive cellular based assay reveals neutralizing capacity of anti-adalimumab antibodies in crohn's disease and ulcerative colitis patients. <u>Gastroenterology</u> 2014;146(5 Suppl):S-242 doi: <a href="http://dx.doi.org/10.1016/S0016-5085%2814%2960852-0">http://dx.doi.org/10.1016/S0016-5085%2814%2960852-0</a> [published Online First: Epub Date]]. | Insufficient data       |
| 195. Vande Castele, N., A. Gils, G. Compernelle, V. Ballet, M. Peeters, K. Van Steen, S. Simoons, G. Van Assche, M. Ferrante, S. Vermeire and P. Rutgeerts (2013). "Drug level versus clinically based dosing of infliximab maintenance therapy in IBD: Final results of the randomized controlled taxit trial." <u>Inflamm Bowel Dis</u> 19: S2-S3.                                                                        | Superseded by full text |
| 196. Vande Castele, N., G. Compernelle, V. Ballet, G. Van Assche, A. Gils, S. Vermeire and P. J. Rutgeerts (2012). "Results on the optimisation phase of the prospective controlled trough level adapted infliximab treatment (TAXIT) trial." <u>Gastroenterology</u> 1): S211-S212                                                                                                                                         | Superseded by full text |
| 197. Vande Castele, N., G. Compernelle, V. Ballet, G. Van Assche, A. Gils, S. Vermeire and P. Rutgeerts (2012). "Individualised infliximab treatment using therapeutic drug monitoring: A prospective controlled Trough level Adapted infliXImab Treatment (TAXIT) trial." <u>Journal of Crohn's and Colitis</u> 6: S6.                                                                                                     | Duplicate               |
| 198. Vande Castele, N., K. Drake, S. Hauenstein, B. G. Levesque, S. Singh and W. Sandborn (2014). "Infliximab and antibody to infliximab concentrations in 7,613 patients shows indication for testing, association with loss of response and provides new insights into binding characteristics of anti-drug antibodies." <u>Gastroenterology</u> 1): S-242.                                                               | Insufficient data       |
| 199. Vande Castele, N., L. Cuypers, S. Singh, L. Ohrmund, S. Hauenstein, G. Van Assche, P. J. Rutgeerts, A. Gils and S. Vermeire (2012). "Antibodies to infliximab can either be persistent or transient: A retrospective case-control study in ibd patients treated with infliximab maintenance therapy." <u>Gastroenterology</u> 1): S114.                                                                                | Insufficient data       |

|                                                                                                                                                                                                                                                                                                                                                                                        |                          |
|----------------------------------------------------------------------------------------------------------------------------------------------------------------------------------------------------------------------------------------------------------------------------------------------------------------------------------------------------------------------------------------|--------------------------|
| 200. Vande Castele, N., L. Cuyppers, S. Singh, S. Hauenstein, L. Ohrmund, E. Chuang, P. Rutgeerts, A. Gils and S. Vermeire (2012). "Transient versus sustained antibodies to infliximab: Possibility to overcome low titer antibody responses by dose optimisation." <u>Journal of Crohn's and Colitis</u> 6: S110.                                                                    | Insufficient data        |
| 201. Vande Castele, N., M. Peeters, M. Ferrante, G. Compennolle, G. Van Assche, S. Vermeire and A. Gils (2014). "Functional cellular based assay reveals neutralising anti-drug antibodies in IBD patients treated with maintenance adalimumab." <u>Journal of Crohn's and Colitis</u> 8: S268-S269.                                                                                   | Duplicate                |
| 202. Vaughn, B. P., M. Martinez-Vazquez, V. Patwardhan, A. C. Moss, W. J. Sandborn and A. S. Cheifetz (2014). "A pilot study of optimized monotherapy with infliximab for patients with inflammatory bowel disease." <u>Gastroenterology</u> 1): S-55.                                                                                                                                 | Superseded by full paper |
| 203. Vaughn, B. P., M. Martinez-Vazquez, V. Patwardhan, A. C. Moss, W. J. Sandborn and A. S. Cheifetz (2014). "Prospective therapeutic drug monitoring to optimizing infliximab (IFX) maintenance therapy in patients with inflammatory bowel disease (IBD)." <u>Gastroenterology</u> 1): S-54.                                                                                        | Superseded by full paper |
| 204. Vaughn, B., M. Matinez-Vazquez and A. Cheifetz (2013). "Infliximab dosing changes based on trough levels in a cohort of IBD patients in clinical remission." <u>Inflamm Bowel Dis</u> 19: S59.                                                                                                                                                                                    | Insufficient data        |
| 205. Velayos, F. S., S. Sheibani, S. Lockton, S. Hauenstein, S. Singh, J. P. Terdiman and U. Mahadevan (2013). "Prevalence of antibodies to adalimumab (ATA) and correlation between ATA and low serum drug concentration on CRP and clinical symptoms in a prospective sample of IBD patients." <u>Gastroenterology</u> 1): S91.                                                      | Insufficient data        |
| 206. Veres, G., J. L. Kaplan, E. De Greef, E. Chuang, D. Szabo, K. Molnar, L. Ohrmund, S. Hauenstein, S. Singh, A. Arato, G. Veerman and H. S. Winter (2012). "New assay to detect infliximab levels and anti-infliximab antibodies from a single serum sample is useful in measuring efficacy of treatment with infliximab in children with IBD." <u>Gastroenterology</u> 1): S386.   | Insufficient data        |
| 207. Wang SL, Ohrmund L, Hauenstein S, et al. Evaluation of a novel homogeneous mobility shift assay for the measurement of human antibodies-To-Infliximab and infliximab levels in Patient serum. <u>Am J Gastroenterol</u> 2011;106:S475-6 doi: <a href="http://dx.doi.org/10.1038/ajg.2011.336_9">http://dx.doi.org/10.1038/ajg.2011.336_9</a> [published Online First: Epub Date]. | Insufficient data        |
| 208. Wang SL, Ohrmund L, Singh S. Measurement of human anti-chimeric antibodies (Haca) and infliximab levels in patient serum using a novel homogeneous assay. <u>Gastroenterology</u> 2010;1):S684-5                                                                                                                                                                                  | Insufficient data        |
| 209. Wang, S. L., L. Ohrmund, S. Hauenstein, J. Salbato, R. Reddy, P. Monk and S. Lockton (2011). "Evaluation of a novel homogeneous mobility shift assay for the measurement of human antibodies-to-infliximab and infliximab levels in patient serum." <u>Arthritis and Rheumatism</u> 1).                                                                                           | Duplicate                |
| 210. Wang, S. L., S. Hauenstein, L. Ohrmund, R. Shringarpure, D. C. Wolf, I. A. Diab, J. Salbato, R. Reddy, K. McCowen, S. Shah, S. Lockton, E. Chuang and S. Singh (2012). "Influence of trough serum drug level and immunogenicity on the lack of response to adalimumab therapy in inflammatory bowel disease patients." <u>Arthritis and Rheumatism</u> 64: S819-S820.             | Insufficient data        |
| 211. Wang, S. L., S. Hauenstein, L. Ohrmund, R. Shringarpure, D. Wolf, I. Diab, J. Salbato, R. Reddy, K. McCowen, S. Shah, S. Lockton, E. Chuang and S. Singh (2012). "Influence of trough serum drug level and immunogenicity on the lack of response to adalimumab therapy in IBD patients presidential poster." <u>American Journal of Gastroenterology</u> 107: S680.              | Duplicate                |
| 212. Ward MG, Kariyawasam VC, Mogan SB, et al. Clinical utility of measuring adalimumab trough levels and antibodies to adalimumab in patients with inflammatory bowel diseases. <u>J Gastroenterol Hepatol</u> 2013;28:100-01 doi: <a href="http://dx.doi.org/10.1111/jgh.12365-6">http://dx.doi.org/10.1111/jgh.12365-6</a> [published Online First: Epub Date].                     | Insufficient data        |

|                                                                                                                                                                                                                                                                                                                                                                                                |                   |
|------------------------------------------------------------------------------------------------------------------------------------------------------------------------------------------------------------------------------------------------------------------------------------------------------------------------------------------------------------------------------------------------|-------------------|
| 213. Wolf, D. C., S. Hauenstein, S. Lockton and S. Singh (2013). "Mechanisms of loss of response to adalimumab in crohn's disease." <u>Gastroenterology</u> 1): S775                                                                                                                                                                                                                           | Insufficient data |
| 214. Wolf, D. C., S. Lockton, S. Hauenstein, S. Carroll, S. Singh and E. Chuang (2013). "A multi-center observational study in community gastroenterology practices evaluating the clinical usage of testing for serum levels of infliximab and antibodies to infliximab." <u>Gastroenterology</u> 1): S423.                                                                                   | Insufficient data |
| 215. Wolf, D., R. Shringarpure, S. Lockton, R. Corey, S. Woods, H. Aguilar and E. Chuang (2012). "Clinical experience with measurement of serum infliximab and antibodies to infliximab using a new homogenous mobility shift assay: Results of a multi-center observational study." <u>American Journal of Gastroenterology</u> 107: S658.                                                    | Insufficient data |
| 216. Yamada, A., K. Sono, K. Takeuchi and Y. Suzuki (2013). "Clinical and basic studies to understand factors associated with the loss of response to infliximab in patients with Crohn's disease." <u>Journal of Crohn's and Colitis</u> 7: S239.                                                                                                                                             | Insufficient data |
| 217. Yanai, H., L. Lichtenstein, A. Assa, Y. Mazor, B. Weiss, A. Levine, Y. Ron, U. Kopylov, Y. Bujanover, Y. Rosenbach, B. Ungar, A. R. Eliakim, Y. Chowers, R. Shamir, G. Fraser, I. Dotan and S. Ben-Horin (2014). "Anti-TNF and anti-drug antibodies levels predict the outcomes of interventions after loss of response to adalimumab and infliximab." <u>Gastroenterology</u> 1): S-381. | Insufficient data |
| 218. Yarur AJ, Deshpande AR, Sussman DA, et al. Serum adalimumab levels and antibodies correlate with endoscopic intestinal inflammation and inflammatory markers in patients with inflammatory bowel disease. <u>Gastroenterology</u> 2013;144(5 Suppl):S774-5                                                                                                                                | Insufficient data |
| 219. Yarur, A., J. P. Trivella, D. A. Sussman, K. Drake, J. S. Barkin, S. Hauenstein, A. R. Deshpande, M. A. Quintero, S. Singh and M. T. Abreu (2014). "Anti-tumor necrosis factor drug levels and anti-bodies are associated with crohn's disease recurrence at the level of the ileo-colonic anastomosis after ileal resection." <u>Gastroenterology</u> 1): S243-S244.                     | Insufficient data |
| 220. Yarur, A., K. Drake, M. Kubiliun, R. M. Dauer, D. A. Sussman, S. Hauenstein, M. A. Quintero, S. Singh, J. S. Barkin and M. T. Abreu (2014). "Anti-tumor necrosis factor levels are not associated with intestinal extent of mucosal inflammation in patients with inflammatory bowel diseases." <u>Gastroenterology</u> 1): S-244.                                                        | Insufficient data |
| 221. Zelinkova, Z., M. P. Peppelenbosch, A. Van Liere-Baron, C. De Haar and C. J. Van Der Woude (2011). "Naturally-occurring autoantibodies against TNF-alpha are present in sera of inflammatory bowel disease patients and influence the response to adalimumab." <u>Gastroenterology</u> 1): S62.                                                                                           | Insufficient data |

CD - Crohn's disease; RA rheumatoid arthritis

## Supplement 5 Drug cut-offs for predicting loss of or lack of regaining response

Supplement 5 Table 1 Drug cut-offs defined by ROC analysis in included studies using drug level as predictor of loss of or lack of regaining response (by assay type and drug)

| Reference               | Cut-off in µg/ml                                                                                                                                                               | Performance measures |      |      |      | AUC (95% CI)                                   | Clinical marker                                                                                                               | Drug | Assay |
|-------------------------|--------------------------------------------------------------------------------------------------------------------------------------------------------------------------------|----------------------|------|------|------|------------------------------------------------|-------------------------------------------------------------------------------------------------------------------------------|------|-------|
|                         |                                                                                                                                                                                | Sens                 | Spec | PPV  | NPV  |                                                |                                                                                                                               |      |       |
| Bortlik<br>2013[41]     | 3                                                                                                                                                                              | 0.70                 | 0.62 | 0.41 | 0.84 | 0.70 (0.57-0.83)                               | Sustained response (no treatment failure or drug intolerance, no surgery, IS introduction, steroids or Infliximab increase)   | IFX  | ELISA |
| Cornillie<br>2014[42]   | 3.5                                                                                                                                                                            | 0.64                 | 0.78 | 0.56 | 0.83 | 0.75                                           | Sustained response (CDAI score change)                                                                                        | IFX  | ELISA |
| Steenholdt<br>2011[33]  | 0.5                                                                                                                                                                            | 0.86                 | 0.85 | NR   | NR   | 0.93 (0.85-1.0)                                | Maintained response (good response to induction therapy at 0, 2 and 6 weeks followed by good response to maintenance therapy) | IFX  | RIA   |
|                         | 2.2 (TL week 14)                                                                                                                                                               | 0.79                 | 0.94 |      |      | 0.93 (SE 0.04)                                 |                                                                                                                               |      |       |
| Chiu<br>2013[47]        | No Adalimumab concentration identified associated with clinical remission at any time point so clinical utility of measuring Adalimumab concentrations was difficult to assess | NR                   | NR   | NR   | NR   | Week 4: 0.51<br>Week 24: 0.58<br>Week 56: 0.57 | Clinical remission (CDAI <150)                                                                                                | ADA  | ELISA |
| Imaeda<br>2014[36]      | 5.9                                                                                                                                                                            | 0.67                 | 0.92 | NR   | NR   | 0.83 (0.80-0.95)                               | CRP ≤0.3mg/dL                                                                                                                 | ADA  | ELISA |
| Mazor<br>2014[37]       | 5.85                                                                                                                                                                           | 0.68                 | 0.71 | NR   | NR   | 0.75 (0.66-0.84)                               | Remission according to 2 physicians' assessment                                                                               | ADA  | ELISA |
| Roblin<br>2014[38]      | 4.85                                                                                                                                                                           | 0.81                 | 0.67 | 0.84 | 0.57 | 0.73                                           | Clinical remission (CDAI <150)<br>MH (disappearance of all ulcerations on endoscopy)                                          | ADA  | ELISA |
|                         | 4.9                                                                                                                                                                            | 0.66                 | 0.85 | 0.88 | 0.51 | 0.77                                           |                                                                                                                               |      |       |
| Frederiksen<br>2014[39] | 14.5                                                                                                                                                                           | 1.00                 | 0.12 | 0.41 | 1.00 | 0.77 (0.62-0.93)                               | LOR (physician's global assessment)                                                                                           | ADA  | RIA   |
|                         | 0.35                                                                                                                                                                           | 0.50                 | 0.96 | 0.89 | 0.76 |                                                |                                                                                                                               |      |       |
|                         | 6.85                                                                                                                                                                           | 0.69                 | 0.69 | 0.58 | 0.78 |                                                |                                                                                                                               |      |       |

Supplement 5 Table 2 Drug cut-offs in included studies not reporting a ROC analysis and using drug level as predictor of loss of or lack of regaining response (by assay type)

| Reference                    | Cut-off in µg/ml | Source of cut-off                                                                    | Drug | Assay |
|------------------------------|------------------|--------------------------------------------------------------------------------------|------|-------|
| Hibi 2014[43]                | 1                | Maser 2006[46]                                                                       | IFX  | ELISA |
| Imaeda 2012[26]              | 0.66             | 95 <sup>th</sup> percentile value from 35 patients who had never received Infliximab | IFX  | ELISA |
| Kopylov 2012[28]             | Unclear          | Unclear                                                                              | IFX  | ELISA |
| Maser 2006[46]               | 1.4              | Unclear                                                                              | IFX  | ELISA |
| Yanai 2012[44] abstract      | 1                | Unclear                                                                              | IFX  | ELISA |
| Ben Bassat 2013[45] abstract | 2                | Derived from data not pre-specified                                                  | IFX  | HMSA  |
| Ainsworth 2008[22]           | 0.5              | Derived from data not pre-specified                                                  | IFX  | RIA   |
| Steenholdt 2014[23]          | 0.5              | Steenholdt 2011[33]                                                                  | IFX  | RIA   |

Supplement 5 Table 3 Additional studies reporting drug cut-offs derived by ROC analysis but not reporting sufficient 2x2 data for using drug level as predictor of loss of or lack of regaining response (by assay type and drug)

| Reference                                                                                           | Cut-off in µg/ml | Performance measures |      |     |     | AUC (95% CI)     | Clinical marker                                                                                       | Drug | Assay |
|-----------------------------------------------------------------------------------------------------|------------------|----------------------|------|-----|-----|------------------|-------------------------------------------------------------------------------------------------------|------|-------|
|                                                                                                     |                  | Sens                 | Spec | PPV | NPV |                  |                                                                                                       |      |       |
| Goldberg R, Beswick L, Van Langenberg D, et al. Journal of Crohn's and Colitis 2014;8:S223 Abstract | 3                | 0.90                 | 0.37 | NR  | NR  | 0.75             | Disease activity (physicians global assessment and CRP levels)                                        | IFX  | ELISA |
| Imaeda H, Bamba S, Takahashi K, et al. J Gastroenterol 2014;49(4):674-82                            | 0.6              | 0.73                 | 0.62 | NR  | NR  | 0.67 (0.60-0.81) | CRP ≤0.3mg/dL<br>Serum albumin (≥ 4.0mg/dL)<br>FC (≤ 300µg/g)<br>MH (Rutgeerts scoring system 0 or 1) | IFX  | ELISA |
|                                                                                                     | 1.0              | 0.67                 | 0.71 | NR  | NR  | 0.72 (0.50-0.73) |                                                                                                       |      |       |
|                                                                                                     | 1.1              | 0.72                 | 0.56 | NR  | NR  | 0.63 (0.55-0.65) |                                                                                                       |      |       |
|                                                                                                     | 4.0              | 0.71                 | 0.70 | NR  | NR  | 0.63 (0.56-0.70) |                                                                                                       |      |       |
| Marits P, Landucci L, Sundin U, et al. Journal of Crohn's & colitis 2014;8(8):881-9                 | 4.1              | 0.87                 | 0.44 | NR  | NR  | 0.74 (SE 0.037)  | Remission (HBI <5 and CRP < 3 mg/l)                                                                   | IFX  | ELISA |
| Nagore D, Ruiz Del Agua                                                                             | 0.8              | 0.86                 | 0.75 | NR  | NR  | 0.86 (0.76-0.96) | Active disease                                                                                        | IFX  | ELISA |

| Reference                                                                               | Cut-off in µg/ml                                                 | Performance measures |              |              |              | AUC (95% CI)                         | Clinical marker                                                                        | Drug | Assay                        |
|-----------------------------------------------------------------------------------------|------------------------------------------------------------------|----------------------|--------------|--------------|--------------|--------------------------------------|----------------------------------------------------------------------------------------|------|------------------------------|
|                                                                                         |                                                                  | Sens                 | Spec         | PPV          | NPV          |                                      |                                                                                        |      |                              |
| A, Pascual J, et al. Therapeutic (TU1325). Gastroenterology 2015;148(4 Suppl 1):S-860   |                                                                  |                      |              |              |              |                                      |                                                                                        |      | (Promonitor)                 |
| Pallagi-Kunstar E, Farkas K, Szepes Z, et al. World J Gastroenterol 2014;20(17):5031-5  | 3.01                                                             | NR                   | NR           | NR           | NR           | NR                                   | Detecting anti-drug antibodies                                                         | IFX  | ELISA                        |
| Paul S, Tedesco ED, Marotte H, et al. Gastroenterology 2012;142(5 Suppl):S354           | 2                                                                | 0.76                 | 0.82         | NR           | NR           | 0.60                                 | Remission (CDAI score <150)                                                            | IFX  | ELISA                        |
| Paul S, Del Tedesco E, Marotte H, et al. Inflamm Bowel Dis 2013;19(12):2568-76          | 0.5 (trough after optimisation minus trough before optimisation) | 0.88                 | 0.76         | 0.78         | 0.86         | 0.91 (0.83-1.0)                      | Mucosal healing (FC <250µg/g)                                                          | IFX  | ELISA (                      |
| Singh N, Rosenthal CJ, Melmed GY, et al. Inflamm Bowel Dis 2014;20(10):1708-13          | 4<br>7                                                           | 0.53<br>0.33         | 0.75<br>1.00 | 0.76<br>1.00 | 0.52<br>0.50 | 0.64 (0.51-0.75)<br>0.67 (0.58-0.75) | Week 14 Infliximab levels as predictor of week 54 clinical remission according to CDAI | IFX  | ELISA                        |
| Baert F, Drobne D, Gils A, et al. Clin Gastroenterol Hepatol 2014;12(9):1474-81         | 2 (after re-exposure to Infliximab)                              | NR                   | NR           | NR           | NR           | 0.76 (0.62-0.90)                     | Long term response (clinical assessment [HBI] and CRP levels[<3mg/l])                  | IFX  | HMSA                         |
| Levesque BG, Greenberg GR, Zou G, et al. Aliment Pharmacol Ther 2014;39(10):1126-35     | 3                                                                | NR                   | NR           | NR           | NR           | NR                                   | Disease activity at week 8 (≥70 point increase in CDAI and CRP >5µg/l)                 | IFX  | HMSA                         |
| Vande Casteele N, Gils A, Singh S, et al. Am J Gastroenterol 2013;108(6):962-71         | 13 (TL week 6)                                                   | 0.72                 | 0.81         | NR           | NR           | 0.87 (SE 0.06)                       | anti-drug antibody formation                                                           | IFX  | HMSA                         |
| Feagan BG, Singh S, Lockton S, et al. Gastroenterology 2012;142(5 Suppl):S-114 Abstract | 3                                                                | NR                   | NR           | NR           | NR           | 0.74                                 | Disease activity                                                                       | IFX  | HPLC based fluid phase assay |
| Goldberg R, Beswick L, Van Langenberg D, et al. Journal of Crohn's and                  | 3                                                                | 0.83                 | 0.63         | NR           | NR           | 0.8                                  | Disease activity (physicians global assessment and CRP levels)                         | ADA  | ELISA                        |



| Reference                                                                                                    | Cut-off in µg/ml | Performance measures |      |      |     | AUC (95% CI)     | Clinical marker                                                                                               | Drug | Assay |
|--------------------------------------------------------------------------------------------------------------|------------------|----------------------|------|------|-----|------------------|---------------------------------------------------------------------------------------------------------------|------|-------|
|                                                                                                              |                  | Sens                 | Spec | PPV  | NPV |                  |                                                                                                               |      |       |
| Colitis 2014;8:S223<br>Abstract                                                                              |                  |                      |      |      |     |                  |                                                                                                               |      |       |
| Karmiris K, Paintaud G,<br>Noman M, et al.<br>Gastroenterology<br>2009;137(5):1628-40                        | 0.33             | 0.95                 | NR   | 0.81 | NR  | NR               | Sustained clinical benefit (patient reporting<br>lasting control of disease with possible dose<br>escalation) | ADA  | ELISA |
| Ward MG, Kariyawasam<br>VC, Mogan SB, et al. J<br>Gastroenterol Hepatol<br>2013;28:100-01 Abstract           | 4.9              | 0.83                 | 0.65 | NR   | NR  | 0.75             | Remission                                                                                                     | ADA  | LISA  |
| arur AJ, Deshpande AR,<br>Sussman DA, et al.<br>Gastroenterology<br>2013;144(5 Suppl):S774-<br>5<br>Abstract | 5                | NR                   | NR   | NR   | NR  | 0.71             | Elevation of CRP                                                                                              | ADA  | HMSA  |
| Mazor Y, Kopylov U,<br>Hur DB, et al.<br>Gastroenterology<br>2013;144(5 Suppl):S-778<br>Abstract             | 5                | NR                   | NR   | NR   | NR  | 0.77 (0.67-0.86) | Clinical response and normal CRP                                                                              | ADA  | NR    |

## Supplement 6 Summary of quality assessment results using the QUADAS-2 tool with index questions adapted to the review for studies comparing performance of different tests

Supplement 6 Table 1 Tabular presentation of QUADAS-2 results

| Study                | RISK OF BIAS      |            |                    |                 | APPLICABILITY CONCERNS |            |                    |
|----------------------|-------------------|------------|--------------------|-----------------|------------------------|------------|--------------------|
|                      | PATIENT SELECTION | INDEX TEST | REFERENCE STANDARD | FLOW AND TIMING | PATIENT SELECTION      | INDEX TEST | REFERENCE STANDARD |
| Ainsworth 2008[22]   |                   |            |                    |                 |                        |            |                    |
| Baert 2014[20]       |                   |            |                    |                 |                        |            |                    |
| Ben-Horin 2011[34]   |                   |            |                    |                 |                        |            |                    |
| Ben-Horin 2012[17]   |                   |            |                    |                 |                        |            |                    |
| Bortlik 2013[41]     |                   |            |                    |                 |                        |            |                    |
| Candon 2005[18]      |                   |            |                    |                 |                        |            |                    |
| Chiu 2013[47]        |                   |            |                    |                 |                        |            |                    |
| Cornillie 2014 [42]  |                   |            |                    |                 |                        |            |                    |
| Farrell 2003[24]     |                   |            |                    |                 |                        |            |                    |
| Frederiksen 2014[39] |                   |            |                    |                 |                        |            |                    |
| Hanauer 2004[25]     |                   |            |                    |                 |                        |            |                    |
| Hibi 2014[43]        |                   |            |                    |                 |                        |            |                    |
| Imaeda 2012[26]      |                   |            |                    |                 |                        |            |                    |
| Imaeda 2014[36]      |                   |            |                    |                 |                        |            |                    |
| Kopylov 2012[28]     |                   |            |                    |                 |                        |            |                    |
| Maser 2006[46]       |                   |            |                    |                 |                        |            |                    |
| Mazor 2014 [37]      |                   |            |                    |                 |                        |            |                    |
| Pariente 2012[19]    |                   |            |                    |                 |                        |            |                    |
| Roblin 2014[38]      |                   |            |                    |                 |                        |            |                    |
| Steenholdt 2011[33]  |                   |            |                    |                 |                        |            |                    |
| Steenholdt 2013[31]  |                   |            |                    |                 |                        |            |                    |
| Steenholdt 2014[23]  |                   |            |                    |                 |                        |            |                    |
| Van Castele 2013[21] |                   |            |                    |                 |                        |            |                    |
| West 2008[40]        |                   |            |                    |                 |                        |            |                    |

Low Risk

High Risk

Unclear Risk

Supplement 6 Figure 1 Graphical summary presentation of QUADAS-2 quality assessment results

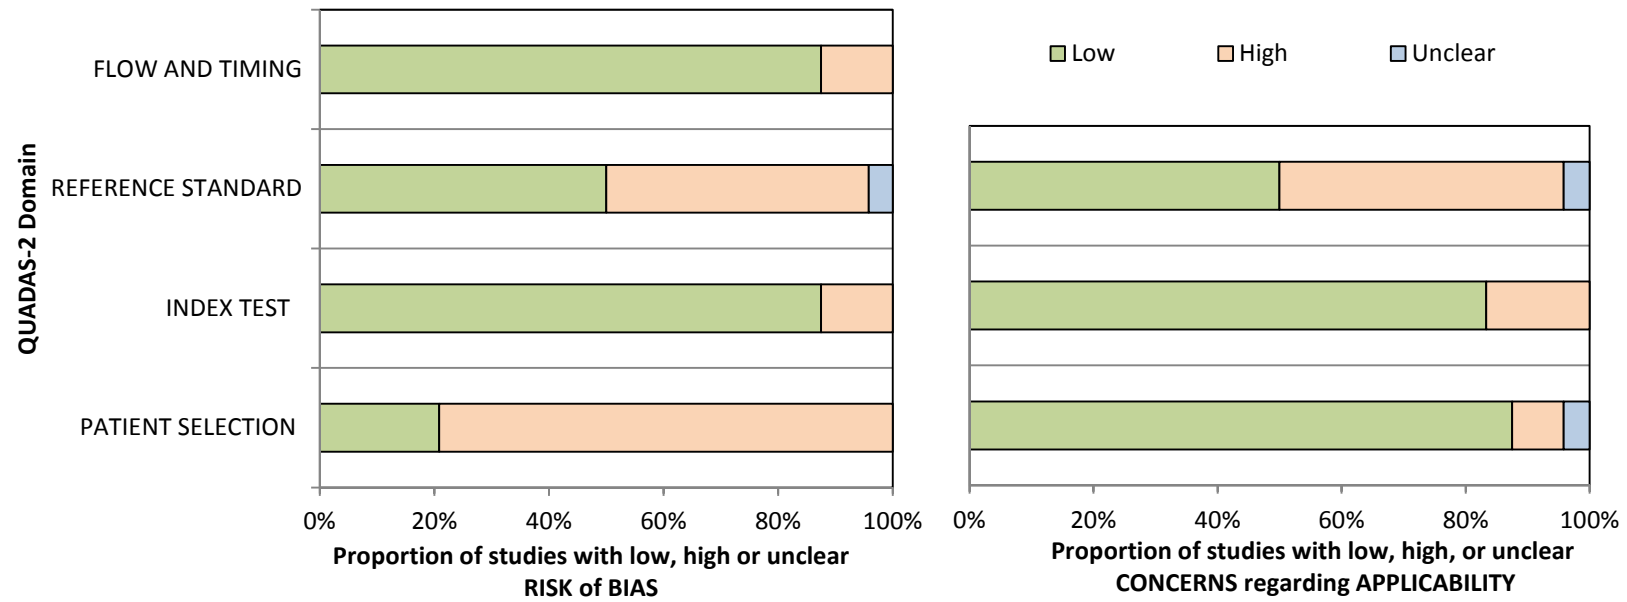

## Supplement 7 Results of hierarchical meta-analysis of included studies

Supplement 7 Table 1 Test accuracy statistics from hierarchical meta-analyses

| <b>Trough Infiximab level as predictor of loss or absence of response</b>                  |           |                |          |          |
|--------------------------------------------------------------------------------------------|-----------|----------------|----------|----------|
| Studies included                                                                           | parameter | Point estimate | 95% LCI  | 95% UCI  |
| all 11 studies                                                                             | Sens      | 0.657232       | 0.546288 | 0.753299 |
| all 11 studies                                                                             | Spec      | 0.80625        | 0.744166 | 0.85618  |
| all 11 studies                                                                             | DOR       | 7.978975       | 4.119972 | 15.45254 |
| all 11 studies                                                                             | LR+       | 3.392169       | 2.35152  | 4.893351 |
| all 11 studies                                                                             | LR-       | 0.425139       | 0.305104 | 0.592398 |
| all 11 studies                                                                             | 1/LR-     | 2.352175       | 1.688056 | 3.277573 |
|                                                                                            |           |                |          |          |
| responder populations only                                                                 | Sens      | 0.681452       | 0.592117 | 0.759178 |
| responder populations only                                                                 | Spec      | 0.790873       | 0.723301 | 0.845468 |
| responder populations only                                                                 | DOR       | 8.090128       | 4.353039 | 15.03551 |
| responder populations only                                                                 | LR+       | 3.258549       | 2.287802 | 4.641198 |
| responder populations only                                                                 | LR-       | 0.402781       | 0.298559 | 0.543385 |
| responder populations only                                                                 | 1/LR-     | 2.482739       | 1.840315 | 3.349423 |
|                                                                                            |           |                |          |          |
| ELISA studies only                                                                         | Sens      | 0.652104       | 0.564027 | 0.730877 |
| ELISA studies only                                                                         | Spec      | 0.789041       | 0.691592 | 0.861849 |
| ELISA studies only                                                                         | DOR       | 7.010794       | 3.450232 | 14.24578 |
| ELISA studies only                                                                         | LR+       | 3.091133       | 1.959085 | 4.877331 |
| ELISA studies only                                                                         | LR-       | 0.440911       | 0.329778 | 0.589495 |
| ELISA studies only                                                                         | 1/LR-     | 2.268033       | 1.696367 | 3.032348 |
| <b>Trough level of antibodies to Infiximab as predictor of loss or absence of response</b> |           |                |          |          |
| Studies included                                                                           | parameter | Point estimate | 95% LCI  | 95% UCI  |
| all 20 studies                                                                             | Sens      | 0.559745       | 0.444812 | 0.668611 |
| all 20 studies                                                                             | Spec      | 0.792243       | 0.688105 | 0.868267 |
| all 20 studies                                                                             | DOR       | 4.848283       | 2.519589 | 9.329239 |
| all 20 studies                                                                             | LR+       | 2.694226       | 1.72293  | 4.213088 |
| all 20 studies                                                                             | LR-       | 0.555707       | 0.426575 | 0.72393  |
| all 20 studies                                                                             | 1/LR-     | 1.799509       | 1.38135  | 2.344251 |
|                                                                                            |           |                |          |          |
| all studies minus outliers*                                                                | Sens      | 0.597          | 0.477    | 0.707    |
| all studies minus outliers*                                                                | Spec      | 0.807          | 0.742    | 0.859    |
| all studies minus outliers*                                                                | DOR       | 6.183          | 3.805    | 10.050   |
| all studies minus outliers*                                                                | LR+       | 3.088          | 2.311    | 4.127    |
| all studies minus outliers*                                                                | LR-       | 0.500          | 0.381    | 0.655    |

|                                                                                             |           |                |           |          |
|---------------------------------------------------------------------------------------------|-----------|----------------|-----------|----------|
| all studies minus outliers                                                                  | 1/LR-     | 2.002          | 1.528     | 2.623    |
|                                                                                             |           |                |           |          |
| responder populations only                                                                  | Sens      | 0.570          | 0.445     | 0.687    |
| responder populations only                                                                  | Spec      | 0.849          | 0.787     | 0.896    |
| responder populations only                                                                  | DOR       | 7.460          | 4.544     | 12.250   |
| responder populations only                                                                  | LR+       | 3.778          | 2.722     | 5.244    |
| responder populations only                                                                  | LR-       | 0.506          | 0.388     | 0.660    |
| responder populations only                                                                  | 1/LR-     | 1.974          | 1.514     | 2.574    |
|                                                                                             |           |                |           |          |
| ELISA studies only                                                                          | Sens      | 0.482          | 0.355     | 0.611    |
| ELISA studies only                                                                          | Spec      | 0.880          | 0.841     | 0.911    |
| ELISA studies only                                                                          | DOR       | 6.830          | 3.872     | 12.050   |
| ELISA studies only                                                                          | LR+       | 4.022          | 2.805     | 5.768    |
| ELISA studies only                                                                          | LR-       | 0.589          | 0.459     | 0.755    |
| ELISA studies only                                                                          | 1/LR-     | 1.698          | 1.324     | 2.178    |
| <b>Trough Adalimumab level as predictor of loss or absence of response</b>                  |           |                |           |          |
|                                                                                             | Parameter | Point estimate | 95% LCI   | 95% UCI  |
| All 5 studies                                                                               | Sens      | 0.543476       | 0.246586  | 0.812386 |
| All 5 studies                                                                               | Spec      | 0.640241       | 0.325873  | 0.86758  |
| All 5 studies                                                                               | DOR       | 2.118592       | 0.172646  | 25.99789 |
| All 5 studies                                                                               | LR+       | 1.510665       | 0.38102   | 5.989464 |
| All 5 studies                                                                               | LR-       | 0.713051       | 0.229687  | 2.213631 |
| All 5 studies                                                                               | 1/LR-     | 1.402424       | 0.451747  | 4.353753 |
|                                                                                             |           |                |           |          |
| All studies minus Chiu                                                                      | Parameter | Point estimate | 95% LCI   | 95% UCI  |
| All studies minus Chiu                                                                      | Sens      | 0.684          | 0.591     | 0.764    |
| All studies minus Chiu                                                                      | Spec      | 0.786          | 0.643     | 0.883    |
| All studies minus Chiu                                                                      | DOR       | 7.971          | 3.646     | 17.428   |
| All studies minus Chiu                                                                      | LR+       | 3.201          | 1.822     | 5.623    |
| All studies minus Chiu                                                                      | LR-       | 0.402          | 0.297     | 0.542    |
| All studies minus Chiu                                                                      | 1/LR-     | 2.490          | 1.844     | 3.363    |
|                                                                                             |           |                |           |          |
| <b>Trough level of antibodies to Adalimumab as predictor of loss or absence of response</b> |           |                |           |          |
|                                                                                             | Parameter | Point estimate | 95% LCI   | 95% UCI  |
| All 6 studies                                                                               | Sens      | 0.471206       | 0.2903357 | 0.66     |
| All 6 studies                                                                               | Spec      | 0.915467       | 0.7939073 | 0.968    |
| All 6 studies                                                                               | DOR       | 9.65022        | 4.387759  | 21.22    |
| All 6 studies                                                                               | LR+       | 5.574189       | 2.646268  | 11.74    |
| All 6 studies                                                                               | LR-       | 0.577623       | 0.4208713 | 0.793    |

|                                                                                                                                                                                                                                             |           |                |           |         |
|---------------------------------------------------------------------------------------------------------------------------------------------------------------------------------------------------------------------------------------------|-----------|----------------|-----------|---------|
| All 6 studies                                                                                                                                                                                                                               | 1/LR-     | 1.731233       | 1.261422  | 2.376   |
|                                                                                                                                                                                                                                             |           |                |           |         |
|                                                                                                                                                                                                                                             | Parameter | Point estimate | 95% LCI   | 95% UCI |
| All studies minus Mazor                                                                                                                                                                                                                     | Sens      | 0.542264       | 0.3611645 | 0.713   |
| All studies minus Mazor                                                                                                                                                                                                                     | Spec      | 0.884874       | 0.7444581 | 0.953   |
| All studies minus Mazor                                                                                                                                                                                                                     | DOR       | 9.105532       | 3.764526  | 22.02   |
| All studies minus Mazor                                                                                                                                                                                                                     | LR+       | 4.710191       | 2.221639  | 9.986   |
| All studies minus Mazor                                                                                                                                                                                                                     | LR-       | 0.517289       | 0.361111  | 0.741   |
| All studies minus Mazor                                                                                                                                                                                                                     | 1/LR-     | 1.933156       | 1.349505  | 2.769   |
| Sens = sensitivity; Spec = specificity; DOR = diagnostic odds ratio; LR+ = positive likelihood ratio;<br>LR- = negative likelihood ratio; 1/LR- = inverse of negative likelihood ratio.<br>*Outliers are Ainsworth 2008 and Steenholdt 2014 |           |                |           |         |

**Supplement 7 Figure 1. Hierarchical meta-analysis of studies of trough levels of antibodies to Adalimumab (upper row) and of Adalimumab (lower row) for predicting loss of response or failure to regain response**

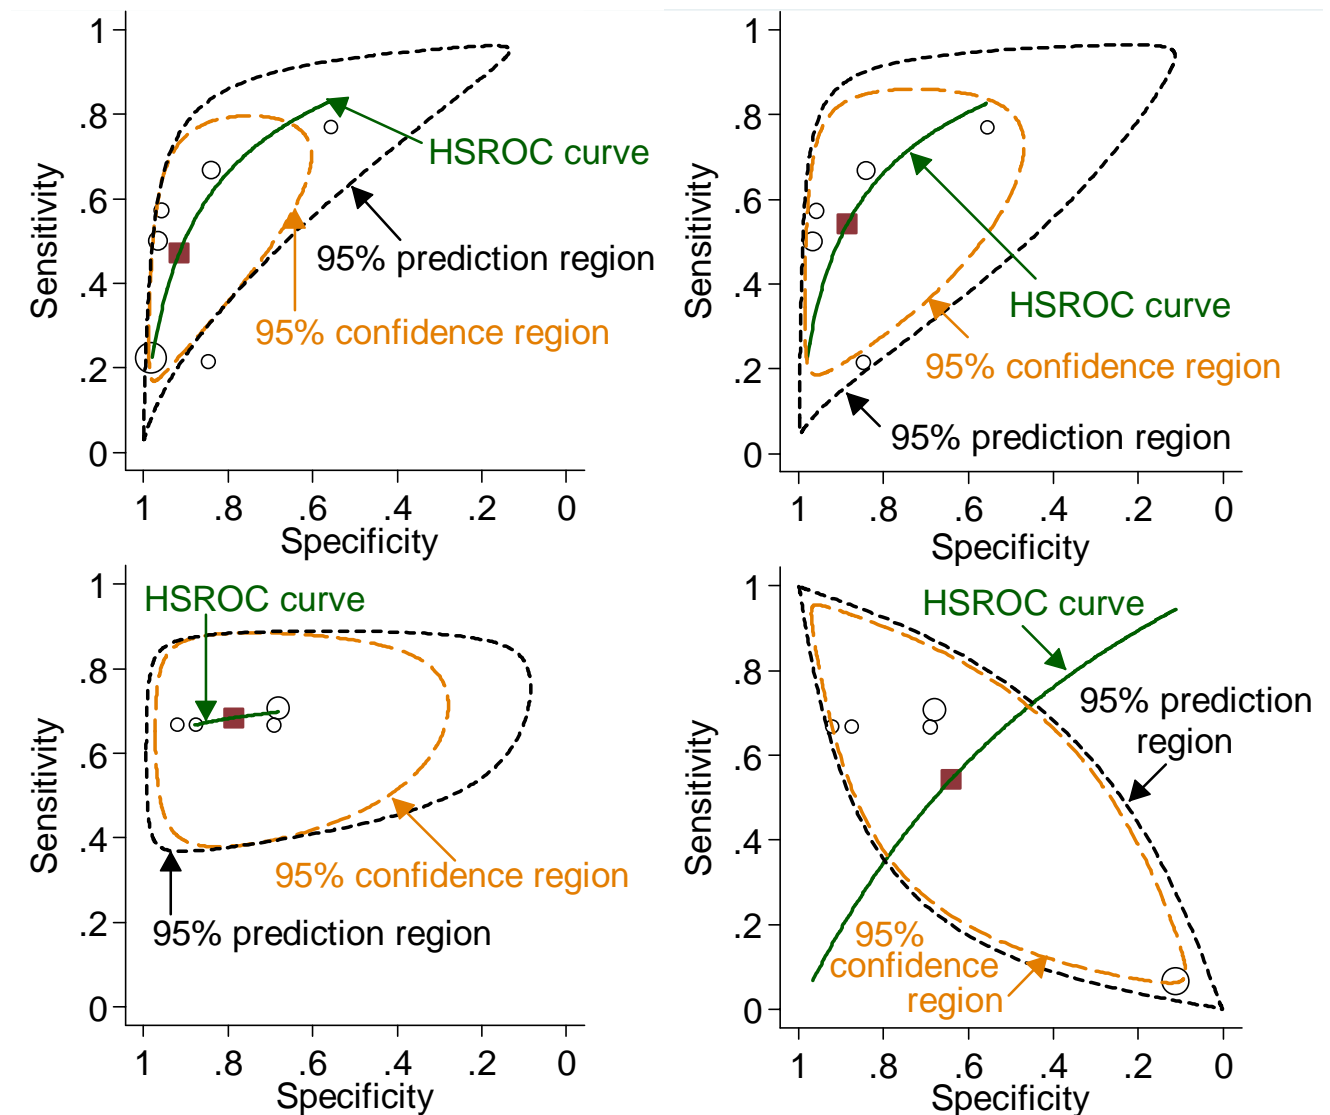

*Top Upper left = all anti-Adalimumab antibody studies; upper right = anti-Adalimumab antibody studies but omitting the study of Mazor; lower left Adalimumab studies but omitting the study of patients with secondary loss of response (Chiu); lower right = all Adalimumab studies. The square symbol represents the summary point estimate on the HSROC curve. Mazor was omitted because it was a particularly large and influential study.*

## Supplement 8 Impact of additional studies on meta-analysis results

**Supplement 8 Table 1 Characteristics of additional studies identified by search update**

| STUDY                                                                                                                                                                                                                                                                                                                                                                                      | DRUG | DIAGNOSIS    | RESPONSE/LOR | TEST  | RESPONSE MEASURE   |
|--------------------------------------------------------------------------------------------------------------------------------------------------------------------------------------------------------------------------------------------------------------------------------------------------------------------------------------------------------------------------------------------|------|--------------|--------------|-------|--------------------|
| <b>Infliximab trough level as predictor of loss of or lack of regaining response</b>                                                                                                                                                                                                                                                                                                       |      |              |              |       |                    |
| Levesque 2014 [51]                                                                                                                                                                                                                                                                                                                                                                         | IFX  | CD           | LOR          | HMSA  | ≥ 70 CDAI increase |
| Reinisch 2016 [53]                                                                                                                                                                                                                                                                                                                                                                         | IFX  | CD           | LOR          | ELISA | Mucosal healing    |
| Ungar 2016 [52]                                                                                                                                                                                                                                                                                                                                                                            | IFX  | CD           | LOR          | HMSA  | Mucosal healing    |
| <b>Adalimumab trough level as predictor of loss of or lack of regaining response</b>                                                                                                                                                                                                                                                                                                       |      |              |              |       |                    |
| Bodini 2015 [54]                                                                                                                                                                                                                                                                                                                                                                           | ADA  | CD           | LOR          | HMSA  | > 7 HBI            |
| Morita 2016 [57]                                                                                                                                                                                                                                                                                                                                                                           | ADA  | CD           | LOR          | ELISA | Mucosal healing    |
| Ungar 2016 [52]                                                                                                                                                                                                                                                                                                                                                                            | ADA  | CD           | LOR          | HMSA  | Mucosal healing    |
| Yarur 2016 [56]                                                                                                                                                                                                                                                                                                                                                                            | ADA  | IBD ~0.89 CD | LOR          | HMSA  | Mucosal healing    |
| Zittan 2016 [55]                                                                                                                                                                                                                                                                                                                                                                           | ADA  | CD           | LOR          | HMSA  | Mucosal healing    |
| Diagnosis = study patient population; LOR = patients with loss of response; Response measure = method used for defining clinical response; ADA = Adalimumab; IFX = Infliximab; CD = Crohn's disease; IBD = inflammatory bowel disease; ELISA = enzyme linked immunoassay; HBI = Harvey-Bradshaw Index; HMSA= Homogenous Mobility Shift Assay; CDAI = Crohn's disease activity index score. |      |              |              |       |                    |

Sensitivity and specificity pairs for the new studies are shown in Supplement 8 Figure 1 together with those for earlier studies.



## Infliximab trough levels

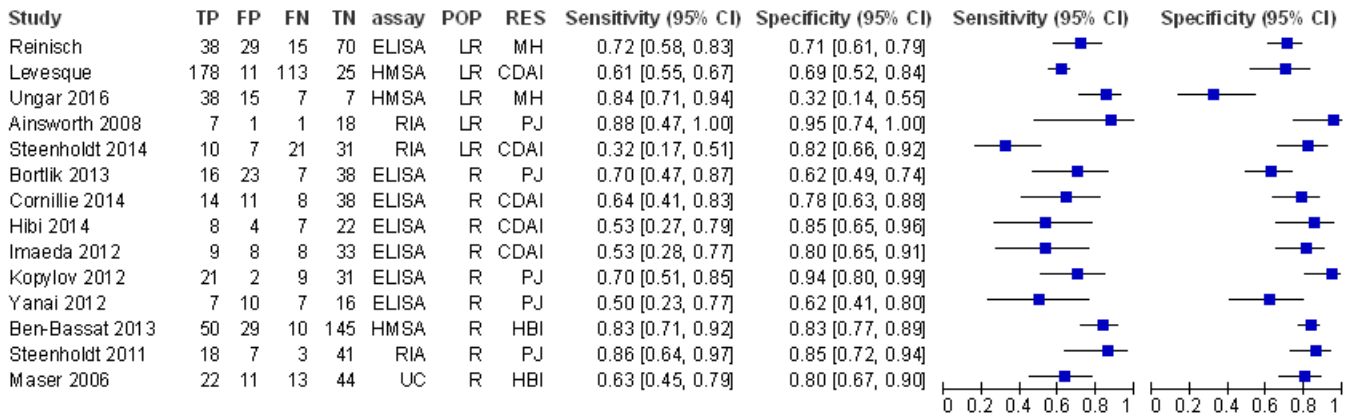

## Adalimumab trough levels

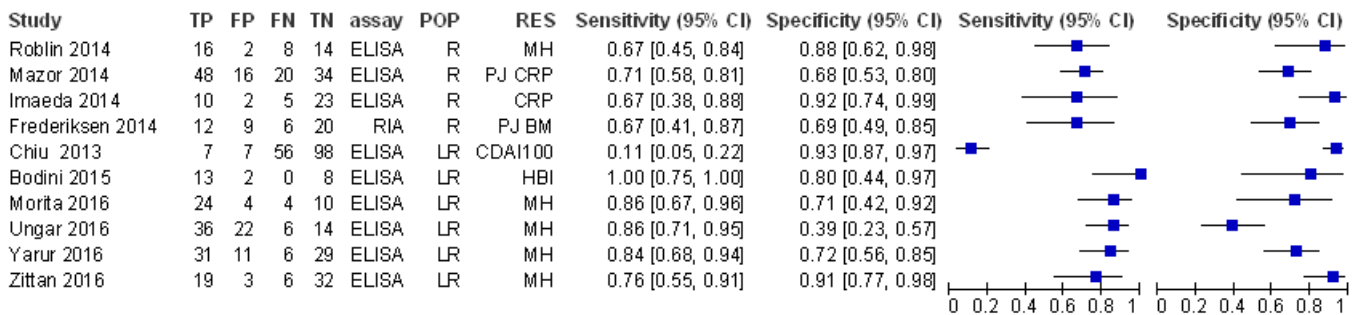

**Supplement 8 Figure 1 Paired forest plots for trough anti-TNF levels for predicting loss of response or failure to regain response to Infliximab (upper, 3 new studies at the top) and Adalimumab (lower, 5 new studies at the bottom);**

*RES = criterion for determining clinical response, POP = study patient population, RIA = radioimmunoassay, HMSA = homogeneous mobility shift assay, ELISA = enzyme linked immunoassay, LR = patients with loss of response, R = patients with response, UC = unclear, PJ BM = physicians' judgement and biological measure; PJ = physicians' judgement, HBI = Harvey Bradshaw Index score, CDAI = Crohn's disease activity index score, CRP = C-reactive protein level, MH = mucosal healing*

### **Meta-analysis of Infliximab trough studies**

Three new studies were identified reporting test accuracy of infliximab trough levels to predict loss of response bringing the total number of studies available for meta-analysis to 14.[51-53] The meta-analysis summary estimates of test accuracy for the original eleven and of the 14 studies are summarised in Supplement 8 Table 2.

**Supplement 8 Table 2 Test accuracy statistics from hierarchical meta-analyses (infliximab studies)**

| <b>Trough Infliximab level as predictor of loss or absence of response</b>                                                                                                           |           |                       |          |          |
|--------------------------------------------------------------------------------------------------------------------------------------------------------------------------------------|-----------|-----------------------|----------|----------|
| Studies included                                                                                                                                                                     | parameter | SummaryPoint estimate | 95% LCI  | 95% UCI  |
| original 11 studies                                                                                                                                                                  | Sens      | 0.657232              | 0.546288 | 0.753299 |
| original 11 studies                                                                                                                                                                  | Spec      | 0.80625               | 0.744166 | 0.85618  |
| original 11 studies                                                                                                                                                                  | DOR       | 7.978975              | 4.119972 | 15.45254 |
| original 11 studies                                                                                                                                                                  | LR+       | 3.392169              | 2.35152  | 4.893351 |
| original 11 studies                                                                                                                                                                  | LR-       | 0.425139              | 0.305104 | 0.592398 |
| original 11 studies                                                                                                                                                                  | 1/LR-     | 2.352175              | 1.688056 | 3.277573 |
| <b>Updated analysis including three new studies</b>                                                                                                                                  |           |                       |          |          |
| all 14 studies                                                                                                                                                                       | Sens      | 0.674018              | 0.587579 | 0.750047 |
| all 14 studies                                                                                                                                                                       | Spec      | 0.774693              | 0.696482 | 0.837453 |
| all 14 studies                                                                                                                                                                       | DOR       | 7.109369              | 4.225833 | 11.96051 |
| all 14 studies                                                                                                                                                                       | LR+       | 2.991547              | 2.163908 | 4.135736 |
| all 14 studies                                                                                                                                                                       | LR-       | 0.420789              | 0.325131 | 0.544592 |
| all 14 studies                                                                                                                                                                       | 1/LR-     | 2.376486              | 1.836237 | 3.075685 |
| <b>Change in summary estimates after including 3 new studies</b>                                                                                                                     |           |                       |          |          |
|                                                                                                                                                                                      | Sens      | 0.016786              | 0.041291 | -0.00325 |
|                                                                                                                                                                                      | Spec      | -0.03156              | -0.04768 | -0.01873 |
|                                                                                                                                                                                      | DOR       | -0.86961              | 0.105861 | -3.49203 |
|                                                                                                                                                                                      | LR+       | -0.40062              | -0.18761 | -0.75762 |
|                                                                                                                                                                                      | LR-       | -0.00435              | 0.020027 | -0.04781 |
|                                                                                                                                                                                      | 1/LR-     | 0.024311              | 0.148181 | -0.20189 |
| Sens = sensitivity; Spec = specificity; DOR = diagnostic odds ratio; LR+ = positive likelihood ratio; LR- = negative likelihood ratio; 1/LR- = inverse of negative likelihood ratio. |           |                       |          |          |

Adding the three new studies has very little impact on the meta-analysis summary test statistic estimates or upon their associated uncertainty. Figure 2 shows the summary ROC plots for the 11 and 14 studies.

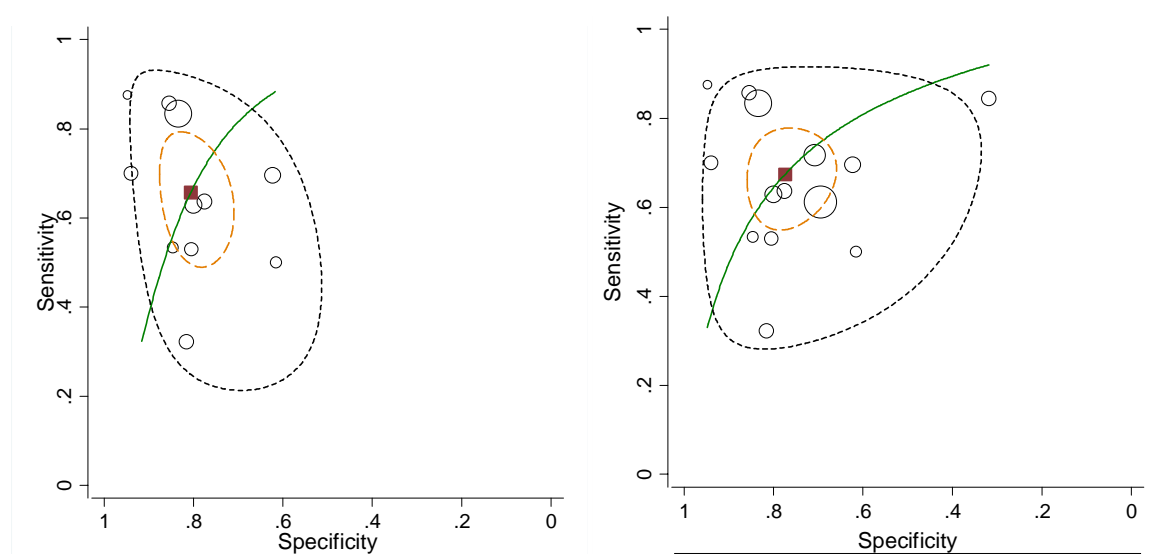

**Supplement 8 Figure 2 Summary ROC plots for 11 (left) and 14 (right) studies of Infliximab trough levels**

### Adalimumab trough studies

Five new studies were identified reporting test accuracy of adalimumab trough levels to predict loss of response,[54-57] thereby bringing the total number of studies available for meta-analysis to nine. The meta-analysis summary estimates for the original four and for the nine studies are summarised in Supplement 8 Table 3.

**Supplement 8 Table 3 Test accuracy statistics from hierarchical meta-analyses (Adalimumab studies)**

| <b>Trough Infliximab level as predictor of loss or absence of response</b>                                                                                                                                                                                                            |           |                       |           |           |
|---------------------------------------------------------------------------------------------------------------------------------------------------------------------------------------------------------------------------------------------------------------------------------------|-----------|-----------------------|-----------|-----------|
| Studies included                                                                                                                                                                                                                                                                      | parameter | SummaryPoint estimate | 95% LCI   | 95% UCI   |
| original 4 studies                                                                                                                                                                                                                                                                    | Sens      | 0.684251              | 0.5914862 | 0.7643434 |
| original 4 studies                                                                                                                                                                                                                                                                    | Spec      | 0.7862228             | 0.6427244 | 0.8826122 |
| original 4 studies                                                                                                                                                                                                                                                                    | DOR       | 7.969987              | 3.64723   | 17.41615  |
| original 4 studies                                                                                                                                                                                                                                                                    | LR+       | 3.200767              | 1.823276  | 5.618956  |
| original 4 studies                                                                                                                                                                                                                                                                    | LR-       | 0.4016025             | 0.2973622 | 0.5423841 |
| original 4 studies                                                                                                                                                                                                                                                                    | 1/LR-     | 2.490025              | 1.843712  | 3.362902  |
| <b>Updated analysis including three new studies</b>                                                                                                                                                                                                                                   |           |                       |           |           |
| all 9 studies                                                                                                                                                                                                                                                                         | Sens      | 0.6357                | 0.547669  | 0.715498  |
| all 9 studies                                                                                                                                                                                                                                                                         | Spec      | 0.710633              | 0.591235  | 0.806565  |
| all 9 studies                                                                                                                                                                                                                                                                         | DOR       | 4.285374              | 1.929981  | 9.515341  |
| all 9 studies                                                                                                                                                                                                                                                                         | LR+       | 2.196862              | 1.378996  | 3.499796  |
| all 9 studies                                                                                                                                                                                                                                                                         | LR-       | 0.512642              | 0.363406  | 0.723164  |
| all 9 studies                                                                                                                                                                                                                                                                         | 1/LR-     | 1.950679              | 1.382813  | 2.751747  |
| <b>Change in summary estimates after including 5 new studies</b>                                                                                                                                                                                                                      |           |                       |           |           |
|                                                                                                                                                                                                                                                                                       | Sens      | -0.04855              | -0.04382  | -0.04885  |
|                                                                                                                                                                                                                                                                                       | Spec      | -0.07559              | -0.05149  | -0.07605  |
|                                                                                                                                                                                                                                                                                       | DOR       | -3.68461              | -1.71725  | -7.90081  |
|                                                                                                                                                                                                                                                                                       | LR+       | -1.00391              | -0.44428  | -2.11916  |
|                                                                                                                                                                                                                                                                                       | LR-       | 0.111039              | 0.066043  | 0.18078   |
|                                                                                                                                                                                                                                                                                       | 1/LR-     | -0.53935              | -0.4609   | -0.61116  |
| Sens = sensitivity; Spec = specificity; DOR = diagnostic odds ratio; LR+ = positive likelihood ratio; LR- = negative likelihood ratio; 1/LR- = inverse of negative likelihood ratio. Note: the outlier study of Chiu 2013 <a href="#">ENREF 47</a> has been omitted from the analyses |           |                       |           |           |

With the exception of estimated DOR, most summary test statistics remain relatively unaltered by the addition of the five new studies. Introduction of the new studies has somewhat reduced the uncertainty of the estimates. The considerable heterogeneity amongst the studies is evident when comparing summary ROC plots for the four and nine studies (Supplement 8 Figure 3).

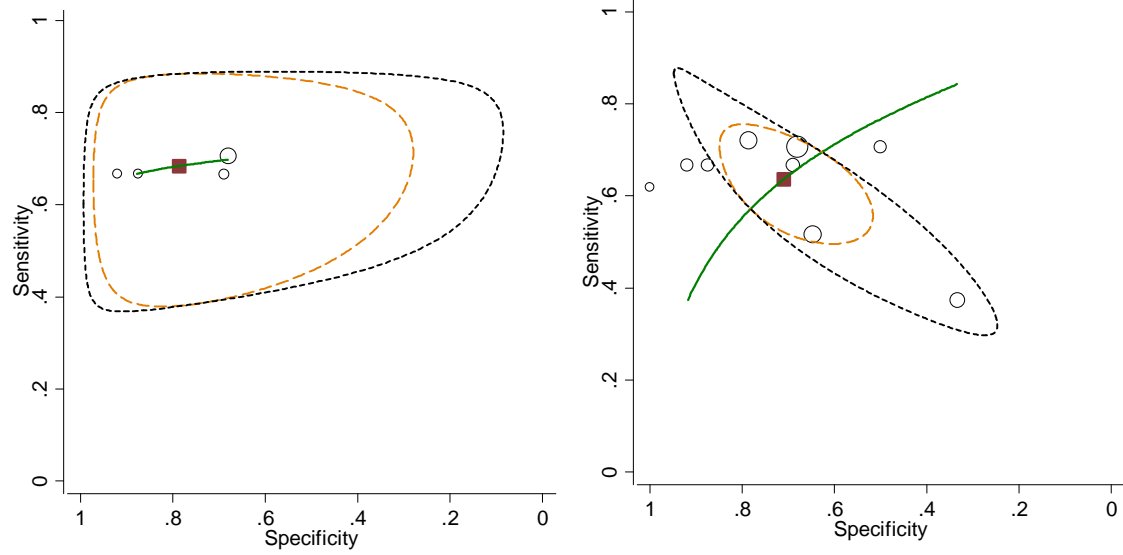

**Supplement 8 Figure 3 Summary ROC plots for 4 (left) and 9 (right) studies of Adalimumab trough levels**

*Note: the outlier study of Chiu 2013 has been omitted from the analyses*
